# Supplementary material for: Theoretical study on the ability of bicyclic cryptands to separate alkali-metal isotopes by ion exchange
Source: Royal Society of Chemistry journal article supplement (doi:10.1039/c9nj02837d), 2019-01-01
Supplement: c9nj02837d1.pdf [file c9nj02837d1.pdf]

# Theoretical study on the ability of bicyclic cryptands to separate alkali-metal isotopes by ion exchange

*Sayako Okumura and Shigeru Ishikawa\**

## Supporting Information

**Table S1.** Optimized geometries and total energies of the cryptands from [1.1.1] to [3.3.3] obtained by the B3LYP method with the aug-cc-pVDZ basis set.

**Table S2.** Total energies of the alkali-metal cations obtained by the B3LYP method with the SDD basis set for Li, Na, K, Rb, and Cs atoms and the MWB pseudo potentials for K to Cs atoms.

**Table S3.** Optimized geometries and total energies of the alkali-metal cryptates from  $[M^+ \subset 1.1.1]$  to  $[M^+ \subset 3.3.3]$  obtained by the B3LYP method with the aug-cc-pVDZ basis set for C, H, N, and O atoms and the SDD basis set for Li, Na, K, Rb, and Cs atoms with the MWB pseudo potentials for K to Cs atoms.

**Table S1. Optimized geometries and energies of the cryptands from [1.1.1] to [3.3.3] by the B3LYP method with the aug-cc-pVDZ basis set.**

[1.1.1] cryptand  $C_{3h}$  symmetry

|   |           |           |           |
|---|-----------|-----------|-----------|
| N | 0.000000  | 0.000000  | 2.000350  |
| N | 0.000000  | 0.000000  | -2.000350 |
| O | -1.182243 | 1.840101  | 0.000000  |
| O | 2.184695  | 0.103802  | 0.000000  |
| O | -1.002453 | -1.943902 | 0.000000  |
| C | -0.742074 | 1.215962  | 2.283570  |
| C | -0.572428 | 2.283563  | 1.203205  |
| C | -0.742074 | 1.215962  | -2.283570 |
| C | -0.572428 | 2.283563  | -1.203205 |
| H | -1.809904 | 0.970354  | 2.352596  |
| H | -0.459906 | 1.666449  | 3.259845  |
| H | -1.035402 | 3.228227  | 1.546446  |
| H | 0.498310  | 2.475367  | 1.031764  |
| H | -0.459906 | 1.666449  | -3.259845 |
| H | -1.809904 | 0.970354  | -2.352596 |
| H | 0.498310  | 2.475367  | -1.031764 |
| H | -1.035402 | 3.228227  | -1.546446 |
| C | 1.424091  | 0.034674  | 2.283570  |
| C | 2.263838  | -0.646044 | 1.203205  |
| C | 1.424091  | 0.034674  | -2.283570 |
| C | 2.263838  | -0.646044 | -1.203205 |
| H | 1.745304  | 1.082246  | 2.352596  |
| H | 1.673141  | -0.434934 | 3.259845  |
| H | 3.313428  | -0.717430 | 1.546446  |
| H | 1.894576  | -1.669233 | 1.031764  |
| H | 1.673141  | -0.434934 | -3.259845 |
| H | 1.745304  | 1.082246  | -2.352596 |
| H | 1.894576  | -1.669233 | -1.031764 |
| H | 3.313428  | -0.717430 | -1.546446 |
| C | -0.682017 | -1.250636 | 2.283570  |
| C | -1.691410 | -1.637519 | 1.203205  |
| C | -0.682017 | -1.250636 | -2.283570 |

|   |           |           |           |
|---|-----------|-----------|-----------|
| C | -1.691410 | -1.637519 | -1.203205 |
| H | 0.064601  | -2.052600 | 2.352596  |
| H | -1.213234 | -1.231515 | 3.259845  |
| H | -2.278026 | -2.510798 | 1.546446  |
| H | -2.392886 | -0.806134 | 1.031764  |
| H | -1.213234 | -1.231515 | -3.259845 |
| H | 0.064601  | -2.052600 | -2.352596 |
| H | -2.392886 | -0.806134 | -1.031764 |
| H | -2.278026 | -2.510798 | -1.546446 |

Total Energy= -806.91953701 au

[2.1.1] cryptand  $C_2$  symmetry

|   |             |             |             |
|---|-------------|-------------|-------------|
| C | 2.76656400  | -0.10890300 | 0.88716800  |
| C | 2.32997400  | 1.09962700  | 1.72605500  |
| O | 0.98936900  | 1.05551000  | 2.18475800  |
| C | -0.98936900 | 1.99162000  | -1.88767600 |
| C | -2.07465800 | 1.63347000  | -0.87089900 |
| O | 0.29831100  | 1.83874700  | -1.31412300 |
| C | 2.45682500  | 0.75380900  | -1.37098500 |
| C | 1.30638800  | 1.36263600  | -2.18288700 |
| C | -1.30638800 | -1.36263600 | -2.18288700 |
| C | -2.45682500 | -0.75380900 | -1.37098500 |
| C | 2.07465800  | -1.63347000 | -0.87089900 |
| C | 0.98936900  | -1.99162000 | -1.88767600 |
| N | 2.07664300  | -0.25711000 | -0.39104400 |
| O | -0.29831100 | -1.83874700 | -1.31412300 |
| N | -2.07664300 | 0.25711000  | -0.39104400 |
| C | 0.73863600  | 0.16927400  | 3.26270500  |
| C | -0.73863600 | -0.16927400 | 3.26270500  |
| O | -0.98936900 | -1.05551000 | 2.18475800  |
| C | -2.32997400 | -1.09962700 | 1.72605500  |
| C | -2.76656400 | 0.10890300  | 0.88716800  |
| H | 3.87146100  | -0.03184700 | 0.76233600  |
| H | 2.59088800  | -1.02145500 | 1.46915100  |
| H | 3.02956100  | 1.19085700  | 2.57916900  |
| H | 2.40171900  | 2.02556600  | 1.14206200  |

|   |             |             |             |
|---|-------------|-------------|-------------|
| H | -1.08175300 | 1.38103700  | -2.79862700 |
| H | -1.14920700 | 3.04236200  | -2.19422600 |
| H | -1.92746500 | 2.28650200  | -0.00170700 |
| H | -3.05014700 | 1.91718300  | -1.33247700 |
| H | 3.20043200  | 0.35957800  | -2.09752000 |
| H | 2.95496500  | 1.57726900  | -0.84457500 |
| H | 0.88291600  | 0.62490800  | -2.87952600 |
| H | 1.72160800  | 2.18349700  | -2.80109900 |
| H | -1.72160800 | -2.18349700 | -2.80109900 |
| H | -0.88291600 | -0.62490800 | -2.87952600 |
| H | -3.20043200 | -0.35957800 | -2.09752000 |
| H | -2.95496500 | -1.57726900 | -0.84457500 |
| H | 1.92746500  | -2.28650200 | -0.00170700 |
| H | 3.05014700  | -1.91718300 | -1.33247700 |
| H | 1.08175300  | -1.38103700 | -2.79862700 |
| H | 1.14920700  | -3.04236200 | -2.19422600 |
| H | 1.31377200  | -0.76508800 | 3.16520100  |
| H | 1.01514900  | 0.64490400  | 4.22317500  |
| H | -1.01514900 | -0.64490400 | 4.22317500  |
| H | -1.31377200 | 0.76508800  | 3.16520100  |
| H | -2.40171900 | -2.02556600 | 1.14206200  |
| H | -3.02956100 | -1.19085700 | 2.57916900  |
| H | -2.59088800 | 1.02145500  | 1.46915100  |
| H | -3.87146100 | 0.03184700  | 0.76233600  |

Total Energy= -960.75350499 au

[2.2.1] cryptand  $C_2$  symmetry

|   |             |             |            |
|---|-------------|-------------|------------|
| N | 2.73653800  | -0.64143800 | 0.46005100 |
| N | -2.73653800 | 0.64143800  | 0.46005100 |
| C | 2.45259700  | -0.18214900 | 1.80927400 |
| C | 1.10329000  | -0.48482000 | 2.49035500 |
| O | 0.00000000  | 0.00000000  | 1.72569200 |
| C | -2.45259700 | 0.18214900  | 1.80927400 |
| C | -1.10329000 | 0.48482000  | 2.49035500 |
| H | 3.22688000  | -0.60583300 | 2.47076900 |
| H | 2.59272300  | 0.90740000  | 1.83962500 |

|   |             |             |             |
|---|-------------|-------------|-------------|
| H | 0.97319300  | -1.56575100 | 2.67021900  |
| H | 1.12901400  | 0.00984300  | 3.47739500  |
| H | -3.22688000 | 0.60583300  | 2.47076900  |
| H | -2.59272300 | -0.90740000 | 1.83962500  |
| H | -0.97319300 | 1.56575100  | 2.67021900  |
| H | -1.12901400 | -0.00984300 | 3.47739500  |
| C | 2.01218600  | -0.04064000 | -0.66395100 |
| C | 2.02464100  | 1.48606200  | -0.63760900 |
| O | 1.31138800  | 1.91733900  | -1.79236500 |
| C | 0.97387600  | 3.29244600  | -1.82830700 |
| C | -3.12295400 | 2.03100100  | 0.28669700  |
| C | -2.03758500 | 3.11834600  | 0.31415400  |
| O | -1.17355500 | 2.95890600  | -0.79986000 |
| C | 0.00000000  | 3.74740700  | -0.74352200 |
| H | 2.50933800  | -0.37381300 | -1.58509300 |
| H | 0.97001100  | -0.37301500 | -0.73518700 |
| H | 1.52879000  | 1.85087600  | 0.27156500  |
| H | 3.05826800  | 1.87886100  | -0.65393800 |
| H | 1.87940000  | 3.92638100  | -1.76051400 |
| H | 0.51843400  | 3.44896900  | -2.81454900 |
| H | -3.64884700 | 2.11526500  | -0.67708500 |
| H | -3.85146500 | 2.28545800  | 1.07428200  |
| H | -2.52983800 | 4.11107900  | 0.28092500  |
| H | -1.45403500 | 3.07204800  | 1.24944900  |
| H | -0.23019900 | 4.81723400  | -0.91475500 |
| H | 0.45604200  | 3.67170100  | 0.25901900  |
| C | 3.12295400  | -2.03100100 | 0.28669700  |
| C | 2.03758500  | -3.11834600 | 0.31415400  |
| O | 1.17355500  | -2.95890600 | -0.79986000 |
| C | 0.00000000  | -3.74740700 | -0.74352200 |
| C | -2.01218600 | 0.04064000  | -0.66395100 |
| C | -2.02464100 | -1.48606200 | -0.63760900 |
| O | -1.31138800 | -1.91733900 | -1.79236500 |
| C | -0.97387600 | -3.29244600 | -1.82830700 |
| H | 3.64884700  | -2.11526500 | -0.67708500 |
| H | 3.85146500  | -2.28545800 | 1.07428200  |

|   |             |             |             |
|---|-------------|-------------|-------------|
| H | 2.52983800  | -4.11107900 | 0.28092500  |
| H | 1.45403500  | -3.07204800 | 1.24944900  |
| H | 0.23019900  | -4.81723400 | -0.91475500 |
| H | -0.45604200 | -3.67170100 | 0.25901900  |
| H | -2.50933800 | 0.37381300  | -1.58509300 |
| H | -0.97001100 | 0.37301500  | -0.73518700 |
| H | -1.52879000 | -1.85087600 | 0.27156500  |
| H | -3.05826800 | -1.87886100 | -0.65393800 |
| H | -1.87940000 | -3.92638100 | -1.76051400 |
| H | -0.51843400 | -3.44896900 | -2.81454900 |

Total Energy= -1114.60980397 au

[2.2.2] cryptand  $C_3$  symmetry

|   |             |             |             |
|---|-------------|-------------|-------------|
| N | 0.00000000  | 0.00000000  | -2.46926700 |
| N | 0.00000000  | 0.00000000  | 2.74034100  |
| C | 1.37919800  | 0.33920800  | -2.82206100 |
| C | 2.08045200  | 1.20114900  | -1.78008000 |
| O | 1.59202100  | 2.54754000  | -1.85007600 |
| C | 2.10969900  | 3.42422200  | -0.86212400 |
| C | 0.75609700  | 1.17450600  | 3.18656000  |
| C | 0.53899300  | 2.42468400  | 2.34237000  |
| O | 1.35741300  | 2.36659100  | 1.18193100  |
| C | 1.23645000  | 3.53127800  | 0.37848500  |
| H | 1.94787800  | -0.59391600 | -2.89020300 |
| H | 1.44489900  | 0.83874400  | -3.81007800 |
| H | 1.90442300  | 0.78403600  | -0.77944000 |
| H | 3.16760800  | 1.20869800  | -1.98416100 |
| H | 3.13414300  | 3.13089700  | -0.57577100 |
| H | 2.15854400  | 4.42197300  | -1.32454400 |
| H | 0.52196600  | 1.41496100  | 4.24615700  |
| H | 1.82750300  | 0.94408600  | 3.14984600  |
| H | -0.51953600 | 2.53057600  | 2.04964400  |
| H | 0.81281600  | 3.31476300  | 2.94015400  |
| H | 0.18498000  | 3.67745900  | 0.07351400  |
| H | 1.55061000  | 4.42176500  | 0.95863800  |
| C | -0.98336100 | 1.02481700  | -2.82206100 |

|   |             |             |             |
|---|-------------|-------------|-------------|
| C | -2.08045200 | 1.20114900  | -1.78008000 |
| O | -3.00224500 | 0.10496000  | -1.85007600 |
| C | -4.02031300 | 0.11494300  | -0.86212400 |
| C | -1.39520100 | 0.06754600  | 3.18656000  |
| C | -2.36933400 | -0.74556000 | 2.34237000  |
| O | -2.72823400 | -0.00774200 | 1.18193100  |
| C | -3.67640100 | -0.69484200 | 0.37848500  |
| H | -0.45959200 | 1.98387000  | -2.89020300 |
| H | -1.44882300 | 0.83194700  | -3.81007800 |
| H | -1.63120600 | 1.25726100  | -0.77944000 |
| H | -2.63056700 | 2.13888000  | -1.98416100 |
| H | -4.27850800 | 1.14879900  | -0.57577100 |
| H | -4.90881300 | -0.34163200 | -1.32454400 |
| H | -1.48637500 | -0.25544400 | 4.24615700  |
| H | -1.73135400 | 1.11062100  | 3.14984600  |
| H | -1.93177500 | -1.71521900 | 2.04964400  |
| H | -3.27707700 | -0.95346200 | 2.94015400  |
| H | -3.27726300 | -1.67853200 | 0.07351400  |
| H | -4.60466600 | -0.86801400 | 0.95863800  |
| C | -0.39583700 | -1.36402400 | -2.82206100 |
| C | 0.00000000  | -2.40229900 | -1.78008000 |
| O | 1.41022400  | -2.65250000 | -1.85007600 |
| C | 1.91061300  | -3.53916400 | -0.86212400 |
| C | 0.63910400  | -1.24205300 | 3.18656000  |
| C | 1.83034100  | -1.67912400 | 2.34237000  |
| O | 1.37082200  | -2.35884900 | 1.18193100  |
| C | 2.43995200  | -2.83643600 | 0.37848500  |
| H | -1.48828600 | -1.38995400 | -2.89020300 |
| H | 0.00392400  | -1.67069100 | -3.81007800 |
| H | -0.27321700 | -2.04129700 | -0.77944000 |
| H | -0.53704100 | -3.34757800 | -1.98416100 |
| H | 1.14436500  | -4.27969600 | -0.57577100 |
| H | 2.75026900  | -4.08034000 | -1.32454400 |
| H | 0.96440900  | -1.15951700 | 4.24615700  |
| H | -0.09614900 | -2.05470700 | 3.14984600  |
| H | 2.45131100  | -0.81535600 | 2.04964400  |

|   |            |             |            |
|---|------------|-------------|------------|
| H | 2.46426100 | -2.36130100 | 2.94015400 |
| H | 3.09228300 | -1.99892700 | 0.07351400 |
| H | 3.05405600 | -3.55375000 | 0.95863800 |

Total Energy= -1268.48112275 au

[3.2.2] cryptand  $C_2$  symmetry

|   |             |             |             |
|---|-------------|-------------|-------------|
| N | 2.43756200  | -2.81835900 | -0.60094500 |
| N | -2.43756200 | 2.81835900  | -0.60094500 |
| O | 0.00000000  | 0.00000000  | 2.89838000  |
| C | 1.17092500  | -0.14493000 | 3.68791200  |
| H | 1.11621600  | -1.07427100 | 4.28339100  |
| H | 1.26423100  | 0.70577500  | 4.38862100  |
| C | -1.17092500 | 0.14493000  | 3.68791200  |
| H | -1.26423100 | -0.70577500 | 4.38862100  |
| H | -1.11621600 | 1.07427100  | 4.28339100  |
| C | 1.27356900  | -3.62229200 | -0.26569000 |
| C | 0.00000000  | -2.84723800 | 0.07031400  |
| O | -0.59399100 | -2.35235000 | -1.13212800 |
| C | -1.58229500 | -1.36109300 | -0.89255300 |
| C | -2.74936100 | 2.60886300  | -2.00404500 |
| C | -2.22777100 | 1.30528900  | -2.60530100 |
| O | -2.98844500 | 0.19560800  | -2.11921900 |
| C | -2.29852600 | -1.04872900 | -2.20744200 |
| H | 1.04298400  | -4.31317600 | -1.09589900 |
| H | 1.51152000  | -4.24138100 | 0.61366300  |
| H | -0.71800400 | -3.52166500 | 0.57466700  |
| H | 0.23987900  | -2.01867400 | 0.75272900  |
| H | -2.30957700 | -1.71898600 | -0.14269700 |
| H | -1.12010100 | -0.44316800 | -0.49368000 |
| H | -3.84140000 | 2.64081100  | -2.14539300 |
| H | -2.32085000 | 3.43072300  | -2.60526300 |
| H | -2.31816400 | 1.34930800  | -3.70699400 |
| H | -1.16653000 | 1.19588900  | -2.34543000 |
| H | -3.04421200 | -1.82143000 | -2.43706600 |
| H | -1.56461000 | -1.03621400 | -3.02857200 |
| C | 3.51211100  | -2.72791900 | 0.37016500  |



|   |             |             |             |
|---|-------------|-------------|-------------|
| C | 3.56461600  | -1.43463700 | 1.18006800  |
| O | 2.43849600  | -1.36935700 | 2.05076000  |
| C | 2.39882700  | -0.16969600 | 2.80263800  |
| C | -3.51211100 | 2.72791900  | 0.37016500  |
| C | -3.56461600 | 1.43463700  | 1.18006800  |
| O | -2.43849600 | 1.36935700  | 2.05076000  |
| C | -2.39882700 | 0.16969600  | 2.80263800  |
| H | 3.44399900  | -3.57038700 | 1.07859100  |
| H | 4.48286400  | -2.81865400 | -0.14516300 |
| H | 4.49701500  | -1.41965400 | 1.77807300  |
| H | 3.57274800  | -0.56912600 | 0.49886600  |
| H | 3.29518400  | -0.09357900 | 3.44753700  |
| H | 2.38961600  | 0.70618300  | 2.13140600  |
| H | -3.44399900 | 3.57038700  | 1.07859100  |
| H | -4.48286400 | 2.81865400  | -0.14516300 |
| H | -4.49701500 | 1.41965400  | 1.77807300  |
| H | -3.57274800 | 0.56912600  | 0.49886600  |
| H | -3.29518400 | 0.09357900  | 3.44753700  |
| H | -2.38961600 | -0.70618300 | 2.13140600  |
| C | 2.74936100  | -2.60886300 | -2.00404500 |
| C | 2.22777100  | -1.30528900 | -2.60530100 |
| O | 2.98844500  | -0.19560800 | -2.11921900 |
| C | 2.29852600  | 1.04872900  | -2.20744200 |
| C | -1.27356900 | 3.62229200  | -0.26569000 |
| C | 0.00000000  | 2.84723800  | 0.07031400  |
| O | 0.59399100  | 2.35235000  | -1.13212800 |
| C | 1.58229500  | 1.36109300  | -0.89255300 |
| H | 3.84140000  | -2.64081100 | -2.14539300 |
| H | 2.32085000  | -3.43072300 | -2.60526300 |
| H | 2.31816400  | -1.34930800 | -3.70699400 |
| H | 1.16653000  | -1.19588900 | -2.34543000 |
| H | 3.04421200  | 1.82143000  | -2.43706600 |
| H | 1.56461000  | 1.03621400  | -3.02857200 |
| H | -1.04298400 | 4.31317600  | -1.09589900 |
| H | -1.51152000 | 4.24138100  | 0.61366300  |
| H | 0.71800400  | 3.52166500  | 0.57466700  |

|   |             |            |             |
|---|-------------|------------|-------------|
| H | -0.23987900 | 2.01867400 | 0.75272900  |
| H | 2.30957700  | 1.71898600 | -0.14269700 |
| H | 1.12010100  | 0.44316800 | -0.49368000 |

Total Energy= -1422.32954596 au

[3.3.2] cryptand  $C_2$  symmetry

|   |             |             |             |
|---|-------------|-------------|-------------|
| N | -2.89915700 | 3.13941300  | 0.63630400  |
| N | 2.89915700  | -3.13941300 | 0.63630400  |
| O | -1.82477000 | -1.85697300 | -1.19158300 |
| O | 1.82477000  | 1.85697300  | -1.19158300 |
| C | -2.44648000 | -1.33767300 | -2.35582300 |
| H | -3.53789800 | -1.50806200 | -2.31761300 |
| H | -2.05237300 | -1.85120300 | -3.25310800 |
| C | 2.07270000  | 3.24408300  | -1.01940800 |
| H | 1.70758200  | 3.81159900  | -1.89481100 |
| H | 3.16038000  | 3.42242500  | -0.92601600 |
| C | -2.07270000 | -3.24408300 | -1.01940800 |
| H | -3.16038000 | -3.42242500 | -0.92601600 |
| H | -1.70758200 | -3.81159900 | -1.89481100 |
| C | 2.44648000  | 1.33767300  | -2.35582300 |
| H | 2.05237300  | 1.85120300  | -3.25310800 |
| H | 3.53789800  | 1.50806200  | -2.31761300 |
| C | -3.40441600 | 2.38056900  | 1.76639200  |
| C | -2.81581400 | 0.97949700  | 1.91426400  |
| O | -1.44029200 | 1.08550500  | 2.25668300  |
| C | -0.74523700 | -0.15182200 | 2.19041900  |
| C | 3.40441600  | -2.38056900 | 1.76639200  |
| C | 2.81581400  | -0.97949700 | 1.91426400  |
| O | 1.44029200  | -1.08550500 | 2.25668300  |
| C | 0.74523700  | 0.15182200  | 2.19041900  |
| H | -3.19685700 | 2.94005700  | 2.69081600  |
| H | -4.50404200 | 2.26885200  | 1.70003900  |
| H | -3.36492700 | 0.43857900  | 2.71011400  |
| H | -2.92702400 | 0.42383400  | 0.97060500  |
| H | -1.00418000 | -0.78991600 | 3.05527800  |
| H | -1.00824700 | -0.68878300 | 1.26642000  |

|   |             |             |             |
|---|-------------|-------------|-------------|
| H | 3.19685700  | -2.94005700 | 2.69081600  |
| H | 4.50404200  | -2.26885200 | 1.70003900  |
| H | 3.36492700  | -0.43857900 | 2.71011400  |
| H | 2.92702400  | -0.42383400 | 0.97060500  |
| H | 1.00418000  | 0.78991600  | 3.05527800  |
| H | 1.00824700  | 0.68878300  | 1.26642000  |
| C | -3.58708800 | 3.02066400  | -0.63549600 |
| C | -2.81581400 | 2.28656900  | -1.73305500 |
| O | -2.92860500 | 0.87801300  | -1.54146400 |
| C | -2.16897300 | 0.14524500  | -2.48712800 |
| C | 2.19307200  | -4.37598300 | 0.91549300  |
| C | 0.70267900  | -4.22844700 | 1.20972900  |
| O | 0.00675800  | -3.86357100 | 0.02237500  |
| C | -1.38887900 | -3.74399200 | 0.23554200  |
| H | -4.54556700 | 2.49751900  | -0.48933300 |
| H | -3.83069700 | 4.02480600  | -1.02541800 |
| H | -3.24185500 | 2.55037900  | -2.72110100 |
| H | -1.75739800 | 2.59229200  | -1.71118200 |
| H | -2.44432000 | 0.45696800  | -3.51290700 |
| H | -1.09235500 | 0.34150600  | -2.34713500 |
| H | 2.30168100  | -5.04884500 | 0.05302400  |
| H | 2.64064500  | -4.89678000 | 1.78542000  |
| H | 0.31802400  | -5.19880200 | 1.58158300  |
| H | 0.54165400  | -3.46557800 | 1.98756200  |
| H | -1.81629800 | -4.73005300 | 0.50147100  |
| H | -1.59547300 | -3.05063000 | 1.06850200  |
| C | -2.19307200 | 4.37598300  | 0.91549300  |
| C | -0.70267900 | 4.22844700  | 1.20972900  |
| O | -0.00675800 | 3.86357100  | 0.02237500  |
| C | 1.38887900  | 3.74399200  | 0.23554200  |
| C | 3.58708800  | -3.02066400 | -0.63549600 |
| C | 2.81581400  | -2.28656900 | -1.73305500 |
| O | 2.92860500  | -0.87801300 | -1.54146400 |
| C | 2.16897300  | -0.14524500 | -2.48712800 |
| H | -2.30168100 | 5.04884500  | 0.05302400  |
| H | -2.64064500 | 4.89678000  | 1.78542000  |

|   |             |             |             |
|---|-------------|-------------|-------------|
| H | -0.31802400 | 5.19880200  | 1.58158300  |
| H | -0.54165400 | 3.46557800  | 1.98756200  |
| H | 1.81629800  | 4.73005300  | 0.50147100  |
| H | 1.59547300  | 3.05063000  | 1.06850200  |
| H | 4.54556700  | -2.49751900 | -0.48933300 |
| H | 3.83069700  | -4.02480600 | -1.02541800 |
| H | 3.24185500  | -2.55037900 | -2.72110100 |
| H | 1.75739800  | -2.59229200 | -1.71118200 |
| H | 2.44432000  | -0.45696800 | -3.51290700 |
| H | 1.09235500  | -0.34150600 | -2.34713500 |

Total Energy= -1576.18657548 au

[3.3.3] cryptand  $D_3$  symmetry

|   |             |             |             |
|---|-------------|-------------|-------------|
| N | 0.00000000  | 0.00000000  | 4.01939400  |
| N | 0.00000000  | 0.00000000  | -4.01939400 |
| O | 0.00000000  | 3.13711500  | 0.00000000  |
| O | 2.71682100  | -1.56855700 | 0.00000000  |
| O | -2.71682100 | -1.56855700 | 0.00000000  |
| C | 0.90625100  | 3.91310500  | 0.76588800  |
| H | 0.36096400  | 4.53494900  | 1.49926800  |
| H | 1.48361700  | 4.58813800  | 0.10642900  |
| C | 2.93572300  | -2.74138800 | 0.76588800  |
| H | 3.74689900  | -2.58007900 | 1.49926800  |
| H | 3.23163600  | -3.57891900 | 0.10642900  |
| C | -3.84197300 | -1.17171600 | 0.76588800  |
| H | -4.10786300 | -1.95487000 | 1.49926800  |
| H | -4.71525200 | -1.00921900 | 0.10642900  |
| C | -0.90625100 | 3.91310500  | -0.76588800 |
| H | -1.48361700 | 4.58813800  | -0.10642900 |
| H | -0.36096400 | 4.53494900  | -1.49926800 |
| C | 3.84197300  | -1.17171600 | -0.76588800 |
| H | 4.71525200  | -1.00921900 | -0.10642900 |
| H | 4.10786300  | -1.95487000 | -1.49926800 |
| C | -2.93572300 | -2.74138800 | -0.76588800 |
| H | -3.23163600 | -3.57891900 | -0.10642900 |
| H | -3.74689900 | -2.58007900 | -1.49926800 |

|   |             |             |             |
|---|-------------|-------------|-------------|
| C | 1.29566900  | 0.61379900  | 4.25941300  |
| C | 1.97117300  | 1.21145800  | 3.03041700  |
| O | 1.22786200  | 2.33604300  | 2.56094500  |
| C | 1.87026800  | 2.98769800  | 1.47916000  |
| C | -1.29566900 | 0.61379900  | -4.25941300 |
| C | -1.97117300 | 1.21145800  | -3.03041700 |
| O | -1.22786200 | 2.33604300  | -2.56094500 |
| C | -1.87026800 | 2.98769800  | -1.47916000 |
| H | 1.21315600  | 1.40377500  | 5.02875100  |
| H | 1.98295200  | -0.14979800 | 4.65241300  |
| H | 2.99273500  | 1.53547300  | 3.31150700  |
| H | 2.04546700  | 0.45202900  | 2.23661700  |
| H | 2.73286300  | 3.57480700  | 1.84810600  |
| H | 2.24808600  | 2.24539500  | 0.75632800  |
| H | -1.21315600 | 1.40377500  | -5.02875100 |
| H | -1.98295200 | -0.14979800 | -4.65241300 |
| H | -2.99273500 | 1.53547300  | -3.31150700 |
| H | -2.04546700 | 0.45202900  | -2.23661700 |
| H | -2.73286300 | 3.57480700  | -1.84810600 |
| H | -2.24808600 | 2.24539500  | -0.75632800 |
| C | -0.11626900 | -1.42898200 | 4.25941300  |
| C | 0.06356700  | -2.31281500 | 3.03041700  |
| O | 1.40914200  | -2.23138100 | 2.56094500  |
| C | 1.65228800  | -3.11354800 | 1.47916000  |
| C | 1.17940000  | 0.81518300  | -4.25941300 |
| C | 2.03474000  | 1.10135600  | -3.03041700 |
| O | 2.63700400  | -0.10466200 | -2.56094500 |
| C | 3.52255600  | 0.12585000  | -1.47916000 |
| H | 0.60912700  | -1.75251100 | 5.02875100  |
| H | -1.12120400 | -1.64238800 | 4.65241300  |
| H | -0.16660900 | -3.35952100 | 3.31150700  |
| H | -0.63126500 | -1.99744100 | 2.23661700  |
| H | 1.72944200  | -4.15413200 | 1.84810600  |
| H | 0.82052600  | -3.06959800 | 0.75632800  |
| H | 1.82228300  | 0.34873600  | -5.02875100 |
| H | 0.86174700  | 1.79218500  | -4.65241300 |

|   |             |             |             |
|---|-------------|-------------|-------------|
| H | 2.82612700  | 1.82404800  | -3.31150700 |
| H | 1.41420200  | 1.54541200  | -2.23661700 |
| H | 4.46230500  | 0.57932600  | -1.84810600 |
| H | 3.06861300  | 0.82420200  | -0.75632800 |
| C | -1.17940000 | 0.81518300  | 4.25941300  |
| C | -2.03474000 | 1.10135600  | 3.03041700  |
| O | -2.63700400 | -0.10466200 | 2.56094500  |
| C | -3.52255600 | 0.12585000  | 1.47916000  |
| C | 0.11626900  | -1.42898200 | -4.25941300 |
| C | -0.06356700 | -2.31281500 | -3.03041700 |
| O | -1.40914200 | -2.23138100 | -2.56094500 |
| C | -1.65228800 | -3.11354800 | -1.47916000 |
| H | -1.82228300 | 0.34873600  | 5.02875100  |
| H | -0.86174700 | 1.79218500  | 4.65241300  |
| H | -2.82612700 | 1.82404800  | 3.31150700  |
| H | -1.41420200 | 1.54541200  | 2.23661700  |
| H | -4.46230500 | 0.57932600  | 1.84810600  |
| H | -3.06861300 | 0.82420200  | 0.75632800  |
| H | -0.60912700 | -1.75251100 | -5.02875100 |
| H | 1.12120400  | -1.64238800 | -4.65241300 |
| H | 0.16660900  | -3.35952100 | -3.31150700 |
| H | 0.63126500  | -1.99744100 | -2.23661700 |
| H | -1.72944200 | -4.15413200 | -1.84810600 |
| H | -0.82052600 | -3.06959800 | -0.75632800 |

Total Energy= -1730.03970314 au

**Table S2. Energies of the alkali metal cations by the B3LYP method with the SDD basis set for Li, Na, K, Rb, and Cs atom and the MWB pseudo potentials for K to Cs atoms.**

Li<sup>+</sup> B3LYP SDD

Total Energy= -7.28499742 au

Na<sup>+</sup> B3LYP SDD

Total Energy= -162.08122918 au

K<sup>+</sup> B3LYP SDD+MWB10

Total Energy= -28.14995475 au

Rb<sup>+</sup> B3LYP SDD+MWB28

Total Energy= -23.93949095 au

Cs<sup>+</sup> B3LYP SDD+MWB46

Total Energy= -20.00175184 au

**Table S3. Optimized geometries and energies of the alkali metal cryptates from [M<sup>+</sup>⊂1.1.1] to [M<sup>+</sup>⊂3.3.3] by the B3LYP method with the aug-cc-pVDZ basis set for C, H, N, and O atoms, and the SDD basis set for Li, Na, K, Rb, and Cs atom with the MWB pseudo potentials for K to Cs atoms.**

[Li<sup>+</sup>⊂1.1.1] C<sub>3h</sub> symmetry

|    |             |             |             |
|----|-------------|-------------|-------------|
| Li | 0.00000000  | 0.00000000  | 0.00000000  |
| N  | 0.00000000  | 0.00000000  | 2.02226000  |
| N  | 0.00000000  | 0.00000000  | -2.02226000 |
| O  | -1.67678500 | -0.95609100 | 0.00000000  |
| O  | 0.01039400  | 1.93018400  | 0.00000000  |
| O  | 1.66639200  | -0.97409300 | 0.00000000  |
| C  | -1.25306700 | -0.71255600 | 2.33905500  |
| C  | -2.29870900 | -0.54296700 | 1.22960500  |
| C  | -1.25306700 | -0.71255600 | -2.33905500 |
| C  | -2.29870900 | -0.54296700 | -1.22960500 |
| H  | -1.02390800 | -1.78058000 | 2.43793400  |
| H  | -1.69054600 | -0.38709400 | 3.29806900  |
| H  | -3.18356400 | -1.16145200 | 1.44226000  |
| H  | -2.62218000 | 0.50629700  | 1.13962400  |
| H  | -1.69054600 | -0.38709400 | -3.29806900 |
| H  | -1.02390800 | -1.78058000 | -2.43793400 |
| H  | -2.62218000 | 0.50629700  | -1.13962400 |
| H  | -3.18356400 | -1.16145200 | -1.44226000 |
| C  | 0.00944200  | 1.44146600  | 2.33905500  |
| C  | 0.67913200  | 2.26222400  | 1.22960500  |
| C  | 0.00944200  | 1.44146600  | -2.33905500 |
| C  | 0.67913200  | 2.26222400  | -1.22960500 |
| H  | -1.03007400 | 1.77702000  | 2.43793400  |
| H  | 0.51004000  | 1.65760300  | 3.29806900  |
| H  | 0.58593500  | 3.33777300  | 1.44226000  |
| H  | 1.74955600  | 2.01772600  | 1.13962400  |
| H  | 0.51004000  | 1.65760300  | -3.29806900 |
| H  | -1.03007400 | 1.77702000  | -2.43793400 |
| H  | 1.74955600  | 2.01772600  | -1.13962400 |
| H  | 0.58593500  | 3.33777300  | -1.44226000 |



|   |            |             |             |
|---|------------|-------------|-------------|
| C | 1.24362500 | -0.72891000 | 2.33905500  |
| C | 1.61957800 | -1.71925700 | 1.22960500  |
| C | 1.24362500 | -0.72891000 | -2.33905500 |
| C | 1.61957800 | -1.71925700 | -1.22960500 |
| H | 2.05398200 | 0.00356000  | 2.43793400  |
| H | 1.18050600 | -1.27050900 | 3.29806900  |
| H | 2.59762900 | -2.17632100 | 1.44226000  |
| H | 0.87262400 | -2.52402300 | 1.13962400  |
| H | 1.18050600 | -1.27050900 | -3.29806900 |
| H | 2.05398200 | 0.00356000  | -2.43793400 |
| H | 0.87262400 | -2.52402300 | -1.13962400 |
| H | 2.59762900 | -2.17632100 | -1.44226000 |

Total Energy= -814.37428493 au

[Li<sup>+</sup>c2.1.1] C<sub>2</sub> symmetry

|    |             |             |             |
|----|-------------|-------------|-------------|
| Li | 0.00000000  | 0.00000000  | 0.22001800  |
| C  | 0.62839000  | 2.89011700  | 0.86596800  |
| C  | -0.59358600 | 2.57431200  | 1.72793900  |
| O  | -0.67612800 | 1.16947400  | 1.99716700  |
| C  | -2.08215300 | -0.68038800 | -1.84675700 |
| C  | -1.98700600 | -1.87618500 | -0.90370800 |
| O  | -1.47498400 | 0.44912000  | -1.21025800 |
| C  | -0.35340700 | 2.58219400  | -1.34621200 |
| C  | -1.11009800 | 1.49350700  | -2.11408800 |
| C  | 1.11009800  | -1.49350700 | -2.11408800 |
| C  | 0.35340700  | -2.58219400 | -1.34621200 |
| C  | 1.98700600  | 1.87618500  | -0.90370800 |
| C  | 2.08215300  | 0.68038800  | -1.84675700 |
| N  | 0.63067400  | 2.07726200  | -0.36622800 |
| O  | 1.47498400  | -0.44912000 | -1.21025800 |
| N  | -0.63067400 | -2.07726200 | -0.36622800 |
| C  | 0.00000000  | 0.75499400  | 3.18851600  |
| C  | 0.00000000  | -0.75499400 | 3.18851600  |
| O  | 0.67612800  | -1.16947400 | 1.99716700  |
| C  | 0.59358600  | -2.57431200 | 1.72793900  |
| C  | -0.62839000 | -2.89011700 | 0.86596800  |

|   |             |             |             |
|---|-------------|-------------|-------------|
| H | 0.65940700  | 3.97598800  | 0.65873600  |
| H | 1.53749100  | 2.65028700  | 1.43072300  |
| H | -0.55244000 | 3.14739100  | 2.66605000  |
| H | -1.52887700 | 2.83801300  | 1.22014000  |
| H | -1.57868700 | -0.87962300 | -2.80451300 |
| H | -3.14059800 | -0.47153100 | -2.06856800 |
| H | -2.65391600 | -1.69610700 | -0.05169400 |
| H | -2.36832100 | -2.76852900 | -1.43596800 |
| H | 0.11987500  | 3.25890500  | -2.08029400 |
| H | -1.09195000 | 3.18164200  | -0.80434100 |
| H | -0.50622900 | 1.07019100  | -2.93026000 |
| H | -2.00929600 | 1.93837700  | -2.57065600 |
| H | 2.00929600  | -1.93837700 | -2.57065600 |
| H | 0.50622900  | -1.07019100 | -2.93026000 |
| H | -0.11987500 | -3.25890500 | -2.08029400 |
| H | 1.09195000  | -3.18164200 | -0.80434100 |
| H | 2.65391600  | 1.69610700  | -0.05169400 |
| H | 2.36832100  | 2.76852900  | -1.43596800 |
| H | 1.57868700  | 0.87962300  | -2.80451300 |
| H | 3.14059800  | 0.47153100  | -2.06856800 |
| H | 1.03523400  | 1.13090400  | 3.20044000  |
| H | -0.52523100 | 1.13590100  | 4.07854700  |
| H | 0.52523100  | -1.13590100 | 4.07854700  |
| H | -1.03523400 | -1.13090400 | 3.20044000  |
| H | 1.52887700  | -2.83801300 | 1.22014000  |
| H | 0.55244000  | -3.14739100 | 2.66605000  |
| H | -1.53749100 | -2.65028700 | 1.43072300  |
| H | -0.65940700 | -3.97598800 | 0.65873600  |

Total Energy= -968.23418833 au

[Li<sup>+</sup>c2.2.1] C<sub>2</sub> symmetry

|    |             |             |             |
|----|-------------|-------------|-------------|
| Li | 0.00000000  | 0.00000000  | -0.36033000 |
| N  | 0.76112300  | 2.37773100  | 0.59475100  |
| N  | -0.76112300 | -2.37773100 | 0.59475100  |
| C  | 0.00000000  | 2.41896400  | 1.83983600  |
| C  | 0.19981600  | 1.17144600  | 2.69014200  |

|   |            |            |            |
|---|------------|------------|------------|
| O | 0.0000000  | 0.0000000  | 1.8886180  |
| C | 0.0000000  | -2.4189640 | 1.8398360  |
| C | -0.1998160 | -1.1714460 | 2.6901420  |
| H | 0.2536700  | 3.2996660  | 2.4649460  |
| H | -1.0653460 | 2.5004440  | 1.5926120  |
| H | 1.2082850  | 1.1359680  | 3.1334540  |
| H | -0.5244100 | 1.1888970  | 3.5199510  |
| H | -0.2536700 | -3.2996660 | 2.4649460  |
| H | 1.0653460  | -2.5004440 | 1.5926120  |
| H | -1.2082850 | -1.1359680 | 3.1334540  |
| H | 0.5244100  | -1.1888970 | 3.5199510  |
| C | 0.2901890  | 3.3269920  | -0.4206240 |
| C | -1.0219340 | 2.9140340  | -1.0637470 |
| O | -0.8648490 | 1.6156150  | -1.6497210 |
| C | -2.0508760 | 1.1424830  | -2.3021760 |
| C | -2.2205620 | -2.4120390 | 0.7790770  |
| C | -2.8683560 | -1.0497850 | 0.5240690  |
| O | -2.2547680 | -0.5019840 | -0.6422100 |
| C | -3.0011370 | 0.5195870  | -1.2947080 |
| H | 0.1704330  | 4.3542950  | -0.0220320 |
| H | 1.0472130  | 3.3688970  | -1.2109880 |
| H | -1.8479580 | 2.9084210  | -0.3359450 |
| H | -1.2782950 | 3.6428120  | -1.8494120 |
| H | -2.5427230 | 1.9563990  | -2.8557220 |
| H | -1.7189480 | 0.3809290  | -3.0180460 |
| H | -2.6526700 | -3.1341850 | 0.0760460  |
| H | -2.4950600 | -2.7603550 | 1.7884700  |
| H | -3.9504670 | -1.1811650 | 0.3657310  |
| H | -2.7282540 | -0.3568360 | 1.3690630  |
| H | -3.8799880 | 0.0956150  | -1.8084240 |
| H | -3.3609100 | 1.2616140  | -0.5627030 |
| C | 2.2205620  | 2.4120390  | 0.7790770  |
| C | 2.8683560  | 1.0497850  | 0.5240690  |
| O | 2.2547680  | 0.5019840  | -0.6422100 |
| C | 3.0011370  | -0.5195870 | -1.2947080 |
| C | -0.2901890 | -3.3269920 | -0.4206240 |

|   |             |             |             |
|---|-------------|-------------|-------------|
| C | 1.02193400  | -2.91403400 | -1.06374700 |
| O | 0.86484900  | -1.61561500 | -1.64972100 |
| C | 2.05087600  | -1.14248300 | -2.30217600 |
| H | 2.65267000  | 3.13418500  | 0.07604600  |
| H | 2.49506000  | 2.76035500  | 1.78847000  |
| H | 3.95046700  | 1.18116500  | 0.36573100  |
| H | 2.72825400  | 0.35683600  | 1.36906300  |
| H | 3.87998800  | -0.09561500 | -1.80842400 |
| H | 3.36091000  | -1.26161400 | -0.56270300 |
| H | -0.17043300 | -4.35429500 | -0.02203200 |
| H | -1.04721300 | -3.36889700 | -1.21098800 |
| H | 1.84795800  | -2.90842100 | -0.33594500 |
| H | 1.27829500  | -3.64281200 | -1.84941200 |
| H | 2.54272300  | -1.95639900 | -2.85572200 |
| H | 1.71894800  | -0.38092900 | -3.01804600 |

Total Energy= -1122.08193169 au

[Li<sup>+</sup>c2.2.2] C<sub>3</sub> symmetry

|    |             |             |             |
|----|-------------|-------------|-------------|
| Li | 0.00000000  | 0.00000000  | 0.31064900  |
| N  | 0.00000000  | 0.00000000  | -1.97803200 |
| N  | 0.00000000  | 0.00000000  | 2.58469700  |
| C  | 1.28544400  | 0.56150400  | -2.49950300 |
| C  | 1.85070900  | 1.71859600  | -1.69705600 |
| O  | 1.03474100  | 2.87977800  | -1.85492500 |
| C  | 1.10937500  | 3.83371300  | -0.80687500 |
| C  | 0.26655800  | 1.37152600  | 3.07859700  |
| C  | -0.40222800 | 2.44760700  | 2.24610000  |
| O  | 0.16889300  | 2.41548400  | 0.93520100  |
| C  | 0.00000000  | 3.65178000  | 0.21409200  |
| H  | 2.02782800  | -0.23962200 | -2.48382700 |
| H  | 1.15922000  | 0.87097000  | -3.55123300 |
| H  | 1.92822000  | 1.44609300  | -0.63322700 |
| H  | 2.86979000  | 1.93521700  | -2.06133600 |
| H  | 2.09346300  | 3.80376700  | -0.31291000 |
| H  | 0.99007800  | 4.82660600  | -1.26392300 |
| H  | -0.04758100 | 1.47386000  | 4.13299400  |

|   |             |             |             |
|---|-------------|-------------|-------------|
| H | 1.34667000  | 1.55222000  | 3.04480500  |
| H | -1.49583300 | 2.31971700  | 2.18913500  |
| H | -0.20620500 | 3.42337700  | 2.71641600  |
| H | -0.98379900 | 3.66185200  | -0.28097600 |
| H | 0.03796100  | 4.49348700  | 0.92354800  |
| C | -1.12899900 | 0.83247500  | -2.49950300 |
| C | -2.41370200 | 0.74346300  | -1.69705600 |
| O | -3.01133100 | -0.54377700 | -1.85492500 |
| C | -3.87478000 | -0.95611000 | -0.80687500 |
| C | -1.32105600 | -0.45491700 | 3.07859700  |
| C | -1.91857600 | -1.57214300 | 2.24610000  |
| O | -2.17631700 | -1.06147600 | 0.93520100  |
| C | -3.16253400 | -1.82589000 | 0.21409200  |
| H | -0.80639500 | 1.87596200  | -2.48382700 |
| H | -1.33389200 | 0.56842900  | -3.55123300 |
| H | -2.21646400 | 0.94684100  | -0.63322700 |
| H | -3.11084300 | 1.51770300  | -2.06133600 |
| H | -4.34089100 | -0.08889200 | -0.31291000 |
| H | -4.67500200 | -1.55587000 | -1.26392300 |
| H | -1.25261000 | -0.77813600 | 4.13299400  |
| H | -2.01759700 | 0.39014100  | 3.04480500  |
| H | -1.26101700 | -2.45528800 | 2.18913500  |
| H | -2.86162900 | -1.89026700 | 2.71641600  |
| H | -2.67935700 | -2.68292100 | -0.28097600 |
| H | -3.91045400 | -2.21386800 | 0.92354800  |
| C | -0.15644500 | -1.39397900 | -2.49950300 |
| C | 0.56299300  | -2.46205900 | -1.69705600 |
| O | 1.97659000  | -2.33600100 | -1.85492500 |
| C | 2.76540600  | -2.87760300 | -0.80687500 |
| C | 1.05449700  | -0.91661000 | 3.07859700  |
| C | 2.32080400  | -0.87546400 | 2.24610000  |
| O | 2.00742400  | -1.35400700 | 0.93520100  |
| C | 3.16253400  | -1.82589000 | 0.21409200  |
| H | -1.22143300 | -1.63633900 | -2.48382700 |
| H | 0.17467200  | -1.43939900 | -3.55123300 |
| H | 0.28824300  | -2.39293400 | -0.63322700 |

|   |            |             |             |
|---|------------|-------------|-------------|
| H | 0.24105200 | -3.45292000 | -2.06133600 |
| H | 2.24742800 | -3.71487600 | -0.31291000 |
| H | 3.68492400 | -3.27073500 | -1.26392300 |
| H | 1.30019100 | -0.69572400 | 4.13299400  |
| H | 0.67092700 | -1.94236100 | 3.04480500  |
| H | 2.75685000 | 0.13557100  | 2.18913500  |
| H | 3.06783400 | -1.53310900 | 2.71641600  |
| H | 3.66315600 | -0.97893100 | -0.28097600 |
| H | 3.87249300 | -2.27961900 | 0.92354800  |

Total Energy= -1275.91504177 au

[Li<sup>+</sup>c2.2.2] C<sub>1</sub> symmetry

|    |             |             |             |
|----|-------------|-------------|-------------|
| Li | -0.35331300 | 0.41192900  | 0.19202700  |
| N  | -0.73528100 | -1.84636600 | -0.11262800 |
| N  | 0.99336100  | 2.26506000  | -0.05515200 |
| C  | -0.39538600 | -2.32534800 | -1.48856300 |
| C  | -0.65194300 | -1.33172900 | -2.60950100 |
| O  | -2.05434500 | -1.08538300 | -2.76654100 |
| C  | -2.42998800 | 0.22066500  | -3.17378900 |
| C  | 0.65740500  | 2.73141600  | -1.41545900 |
| C  | -0.82777800 | 2.69109900  | -1.74006600 |
| O  | -1.39273800 | 1.44577000  | -1.30274700 |
| C  | -2.63794500 | 1.13946900  | -1.97681800 |
| H  | 0.67336900  | -2.55698900 | -1.50402300 |
| H  | -0.93458200 | -3.26497100 | -1.69955300 |
| H  | -0.11754100 | -0.39239600 | -2.41266200 |
| H  | -0.25496100 | -1.75726000 | -3.54632200 |
| H  | -1.69733000 | 0.64464700  | -3.88060200 |
| H  | -3.38670000 | 0.12339400  | -3.70668300 |
| H  | 1.01313400  | 3.76559400  | -1.59025600 |
| H  | 1.18653800  | 2.08602300  | -2.12449600 |
| H  | -1.38487100 | 3.51783300  | -1.27340300 |
| H  | -0.93790500 | 2.79626100  | -2.82904500 |
| H  | -3.28502200 | 0.64658900  | -1.24287600 |
| H  | -3.12534000 | 2.07608800  | -2.28472300 |
| C  | -2.19643200 | -2.05625700 | 0.13355900  |

|   |             |             |             |
|---|-------------|-------------|-------------|
| C | -2.80409800 | -1.08686900 | 1.13226600  |
| O | -2.18956000 | -1.23747100 | 2.40957700  |
| C | -2.31490600 | -0.12529800 | 3.28538600  |
| C | 0.34967100  | 3.10266800  | 0.98299100  |
| C | 0.21459100  | 2.37661400  | 2.30792900  |
| O | -0.66871400 | 1.25663400  | 2.12962800  |
| C | -1.01165300 | 0.64251900  | 3.39154900  |
| H | -2.72793900 | -1.92231100 | -0.81177700 |
| H | -2.37653500 | -3.09238200 | 0.46533600  |
| H | -2.68528500 | -0.04847600 | 0.78122500  |
| H | -3.88743100 | -1.28482100 | 1.20812900  |
| H | -3.12936900 | 0.54175400  | 2.96442400  |
| H | -2.56636800 | -0.50822000 | 4.28543600  |
| H | 0.90476200  | 4.04502400  | 1.14064500  |
| H | -0.65872100 | 3.37526400  | 0.65627500  |
| H | 1.18283700  | 2.02531100  | 2.69728900  |
| H | -0.21712800 | 3.06633400  | 3.04907800  |
| H | -0.19410900 | -0.02526700 | 3.70389400  |
| H | -1.12822600 | 1.43025700  | 4.15183900  |
| C | 0.01399900  | -2.68124000 | 0.87938500  |
| C | 1.46743200  | -2.30876900 | 1.10280800  |
| O | 2.27132800  | -2.71155100 | -0.00643300 |
| C | 3.63147600  | -2.29806200 | 0.07142800  |
| C | 2.46635200  | 2.33033300  | 0.13362900  |
| C | 3.29180300  | 1.31013000  | -0.63249400 |
| O | 3.07920900  | 0.03146200  | -0.06461400 |
| C | 3.86863600  | -0.99324000 | -0.66737200 |
| H | -0.49313600 | -2.57196600 | 1.84096200  |
| H | -0.04978200 | -3.74500400 | 0.59079000  |
| H | 1.57079100  | -1.22739600 | 1.27667400  |
| H | 1.81644500  | -2.83203900 | 2.01030300  |
| H | 3.94748600  | -2.20704900 | 1.12287500  |
| H | 4.23743800  | -3.08412600 | -0.40037000 |
| H | 2.82486900  | 3.34174800  | -0.13525300 |
| H | 2.68193100  | 2.18459800  | 1.19762500  |
| H | 3.05847200  | 1.29732400  | -1.71111100 |

|   |            |             |             |
|---|------------|-------------|-------------|
| H | 4.35362000 | 1.59905400  | -0.53817000 |
| H | 3.59043800 | -1.10231200 | -1.72985600 |
| H | 4.94067400 | -0.73107000 | -0.61539900 |

Total Energy= -1275.91824488 au

[Na<sup>+</sup>⊂1.1.1] C<sub>3h</sub> symmetry

|    |             |             |             |
|----|-------------|-------------|-------------|
| Na | 0.00000000  | 0.00000000  | 0.00000000  |
| N  | 0.00000000  | 0.00000000  | 2.15861100  |
| N  | 0.00000000  | 0.00000000  | -2.15861100 |
| O  | -1.82340100 | -1.15197300 | 0.00000000  |
| O  | -0.08593700 | 2.15509900  | 0.00000000  |
| O  | 1.90933900  | -1.00312500 | 0.00000000  |
| C  | -1.26681300 | -0.72415600 | 2.36977200  |
| C  | -2.31648000 | -0.58486000 | 1.23858300  |
| C  | -1.26681300 | -0.72415600 | -2.36977200 |
| C  | -2.31648000 | -0.58486000 | -1.23858300 |
| H  | -1.03157600 | -1.78886700 | 2.49277200  |
| H  | -1.76645300 | -0.40349900 | 3.30099200  |
| H  | -3.23245600 | -1.11002500 | 1.54748500  |
| H  | -2.57297800 | 0.47459000  | 1.07652400  |
| H  | -1.76645300 | -0.40349900 | -3.30099200 |
| H  | -1.03157600 | -1.78886700 | -2.49277200 |
| H  | -2.57297800 | 0.47459000  | -1.07652400 |
| H  | -3.23245600 | -1.11002500 | -1.54748500 |
| C  | 0.00626900  | 1.45917100  | 2.36977200  |
| C  | 0.65173600  | 2.29856100  | 1.23858300  |
| C  | 0.00626900  | 1.45917100  | -2.36977200 |
| C  | 0.65173600  | 2.29856100  | -1.23858300 |
| H  | -1.03341700 | 1.78780500  | 2.49277200  |
| H  | 0.53378600  | 1.73154300  | 3.30099200  |
| H  | 0.65491800  | 3.35440100  | 1.54748500  |
| H  | 1.69749600  | 1.99096900  | 1.07652400  |
| H  | 0.53378600  | 1.73154300  | -3.30099200 |
| H  | -1.03341700 | 1.78780500  | -2.49277200 |
| H  | 1.69749600  | 1.99096900  | -1.07652400 |
| H  | 0.65491800  | 3.35440100  | -1.54748500 |



|   |            |             |             |
|---|------------|-------------|-------------|
| C | 1.26054400 | -0.73501400 | 2.36977200  |
| C | 1.66474400 | -1.71370000 | 1.23858300  |
| C | 1.26054400 | -0.73501400 | -2.36977200 |
| C | 1.66474400 | -1.71370000 | -1.23858300 |
| H | 2.06499200 | 0.00106300  | 2.49277200  |
| H | 1.23266700 | -1.32804300 | 3.30099200  |
| H | 2.57753800 | -2.24437600 | 1.54748500  |
| H | 0.87548200 | -2.46555900 | 1.07652400  |
| H | 1.23266700 | -1.32804300 | -3.30099200 |
| H | 2.06499200 | 0.00106300  | -2.49277200 |
| H | 0.87548200 | -2.46555900 | -1.07652400 |
| H | 2.57753800 | -2.24437600 | -1.54748500 |

Total Energy= -969.07632460 au

[Na<sup>+</sup>c2.1.1] C<sub>2</sub> symmetry

|    |             |             |             |
|----|-------------|-------------|-------------|
| Na | 0.00000000  | 0.00000000  | 0.34259700  |
| C  | -0.38467800 | -3.00988000 | 0.80116000  |
| C  | 0.63290800  | -2.63591500 | 1.89082900  |
| O  | 0.66968500  | -1.22659200 | 2.16228000  |
| C  | 1.76210200  | 0.99332400  | -2.10312500 |
| C  | 1.51229600  | 2.23161300  | -1.23106200 |
| O  | 1.60082000  | -0.19350200 | -1.32280200 |
| C  | 0.96187400  | -2.53599500 | -1.20239800 |
| C  | 1.51229600  | -1.40249100 | -2.08037700 |
| C  | -1.51229600 | 1.40249100  | -2.08037700 |
| C  | -0.96187400 | 2.53599500  | -1.20239800 |
| C  | -1.51229600 | -2.23161300 | -1.23106200 |
| C  | -1.76210200 | -0.99332400 | -2.10312500 |
| N  | -0.26343600 | -2.22169000 | -0.44522100 |
| O  | -1.60082000 | 0.19350200  | -1.32280200 |
| N  | 0.26343600  | 2.22169000  | -0.44522100 |
| C  | -0.03333400 | -0.75937700 | 3.32080500  |
| C  | 0.03333400  | 0.75937700  | 3.32080500  |
| O  | -0.66968500 | 1.22659200  | 2.16228000  |
| C  | -0.63290800 | 2.63591500  | 1.89082900  |
| C  | 0.38467800  | 3.00988000  | 0.80116000  |

|   |             |             |             |
|---|-------------|-------------|-------------|
| H | -0.29500500 | -4.09975000 | 0.62327100  |
| H | -1.39414100 | -2.83870400 | 1.19555400  |
| H | 0.38841200  | -3.19915100 | 2.80340700  |
| H | 1.65480600  | -2.91333600 | 1.60276000  |
| H | 1.08523900  | 0.95710500  | -2.96852400 |
| H | 2.78994100  | 1.05673600  | -2.49756200 |
| H | 2.34323400  | 2.30491300  | -0.51929600 |
| H | 1.57900900  | 3.11827100  | -1.89091000 |
| H | 0.82158700  | -3.42021700 | -1.85389700 |
| H | 1.74121400  | -2.79946200 | -0.47939800 |
| H | 0.88436600  | -1.23375300 | -2.96677000 |
| H | 2.50985800  | -1.70165500 | -2.44250100 |
| H | -2.50985800 | 1.70165500  | -2.44250100 |
| H | -0.88436600 | 1.23375300  | -2.96677000 |
| H | -0.82158700 | 3.42021700  | -1.85389700 |
| H | -1.74121400 | 2.79946200  | -0.47939800 |
| H | -2.34323400 | -2.30491300 | -0.51929600 |
| H | -1.57900900 | -3.11827100 | -1.89091000 |
| H | -1.08523900 | -0.95710500 | -2.96852400 |
| H | -2.78994100 | -1.05673600 | -2.49756200 |
| H | -1.08435600 | -1.08929500 | 3.29896600  |
| H | 0.44120400  | -1.14595300 | 4.23656700  |
| H | -0.44120400 | 1.14595300  | 4.23656700  |
| H | 1.08435600  | 1.08929500  | 3.29896600  |
| H | -1.65480600 | 2.91333600  | 1.60276000  |
| H | -0.38841200 | 3.19915100  | 2.80340700  |
| H | 1.39414100  | 2.83870400  | 1.19555400  |
| H | 0.29500500  | 4.09975000  | 0.62327100  |

Total Energy= -1122.98153486 au

[Na<sup>+</sup>∩2.2.1] C<sub>2</sub> symmetry

|    |             |             |             |
|----|-------------|-------------|-------------|
| Na | 0.00000000  | 0.00000000  | -0.52621300 |
| N  | 0.14382400  | 2.49034400  | 0.50930800  |
| N  | -0.14382400 | -2.49034400 | 0.50930800  |
| C  | -0.51347700 | 2.35816300  | 1.81515800  |
| C  | 0.00000000  | 1.20108000  | 2.66733400  |

|   |             |             |             |
|---|-------------|-------------|-------------|
| O | 0.00000000  | 0.00000000  | 1.89154900  |
| C | 0.51347700  | -2.35816300 | 1.81515800  |
| C | 0.00000000  | -1.20108000 | 2.66733400  |
| H | -0.42210400 | 3.28559800  | 2.41640400  |
| H | -1.58349700 | 2.19485500  | 1.64342400  |
| H | 1.01564500  | 1.38868700  | 3.05178400  |
| H | -0.66646000 | 1.09460000  | 3.53800800  |
| H | 0.42210400  | -3.28559800 | 2.41640400  |
| H | 1.58349700  | -2.19485500 | 1.64342400  |
| H | -1.01564500 | -1.38868700 | 3.05178400  |
| H | 0.66646000  | -1.09460000 | 3.53800800  |
| C | -0.62610000 | 3.34725200  | -0.41243300 |
| C | -1.91078600 | 2.71608400  | -0.92759400 |
| O | -1.59210500 | 1.51652000  | -1.63820400 |
| C | -2.73659800 | 0.79924400  | -2.11566900 |
| C | -1.55175200 | -2.92190600 | 0.60572700  |
| C | -2.56041800 | -1.78151600 | 0.50198100  |
| O | -2.27896700 | -1.03666000 | -0.68248500 |
| C | -3.30635400 | -0.11752700 | -1.04615700 |
| H | -0.88659700 | 4.32321000  | 0.04356500  |
| H | 0.01020400  | 3.55276200  | -1.28063300 |
| H | -2.61925900 | 2.50379600  | -0.11186400 |
| H | -2.40040800 | 3.43050500  | -1.60975600 |
| H | -3.51152300 | 1.49489900  | -2.47308700 |
| H | -2.38757000 | 0.20293500  | -2.96792400 |
| H | -1.75938300 | -3.61880600 | -0.21455900 |
| H | -1.74333900 | -3.47506200 | 1.54268400  |
| H | -3.57394800 | -2.21304500 | 0.45033600  |
| H | -2.52396400 | -1.10811400 | 1.37308800  |
| H | -4.18466900 | -0.65514400 | -1.44179000 |
| H | -3.63220000 | 0.45529700  | -0.16143400 |
| C | 1.55175200  | 2.92190600  | 0.60572700  |
| C | 2.56041800  | 1.78151600  | 0.50198100  |
| O | 2.27896700  | 1.03666000  | -0.68248500 |
| C | 3.30635400  | 0.11752700  | -1.04615700 |
| C | 0.62610000  | -3.34725200 | -0.41243300 |

|   |             |             |             |
|---|-------------|-------------|-------------|
| C | 1.91078600  | -2.71608400 | -0.92759400 |
| O | 1.59210500  | -1.51652000 | -1.63820400 |
| C | 2.73659800  | -0.79924400 | -2.11566900 |
| H | 1.75938300  | 3.61880600  | -0.21455900 |
| H | 1.74333900  | 3.47506200  | 1.54268400  |
| H | 3.57394800  | 2.21304500  | 0.45033600  |
| H | 2.52396400  | 1.10811400  | 1.37308800  |
| H | 4.18466900  | 0.65514400  | -1.44179000 |
| H | 3.63220000  | -0.45529700 | -0.16143400 |
| H | 0.88659700  | -4.32321000 | 0.04356500  |
| H | -0.01020400 | -3.55276200 | -1.28063300 |
| H | 2.61925900  | -2.50379600 | -0.11186400 |
| H | 2.40040800  | -3.43050500 | -1.60975600 |
| H | 3.51152300  | -1.49489900 | -2.47308700 |
| H | 2.38757000  | -0.20293500 | -2.96792400 |

Total Energy= -1276.85196842 au

[Na<sup>+</sup>c2.2.2] C<sub>3</sub> symmetry

|    |             |             |             |
|----|-------------|-------------|-------------|
| Na | 0.00000000  | 0.00000000  | 0.01290100  |
| N  | 0.00000000  | 0.00000000  | 3.17844500  |
| N  | 0.00000000  | 0.00000000  | -3.18274800 |
| C  | -1.17703200 | 0.75894000  | 3.61416100  |
| C  | -2.39478000 | 0.52621500  | 2.73869800  |
| O  | -2.11876700 | 0.99642200  | 1.41716700  |
| C  | -3.30627300 | 1.14959600  | 0.64332500  |
| C  | -1.32736100 | 0.44728400  | -3.61688700 |
| C  | -1.90514300 | 1.54132000  | -2.73778000 |
| O  | -2.10451400 | 1.02716300  | -1.41881500 |
| C  | -2.96789100 | 1.85625600  | -0.64502100 |
| H  | -1.44668800 | 0.53013400  | 4.66463000  |
| H  | -0.94112200 | 1.82870700  | 3.57468900  |
| H  | -2.68526500 | -0.53684600 | 2.70196100  |
| H  | -3.24367700 | 1.08920100  | 3.16071600  |
| H  | -3.75755700 | 0.16474200  | 0.43391500  |
| H  | -4.04211000 | 1.75659500  | 1.19725500  |
| H  | -1.31716300 | 0.80423200  | -4.66623200 |

|   |             |             |             |
|---|-------------|-------------|-------------|
| H | -2.01616500 | -0.40469700 | -3.58015800 |
| H | -1.25342700 | 2.42971400  | -2.69540400 |
| H | -2.87312100 | 1.85753400  | -3.16058700 |
| H | -2.48333800 | 2.82513000  | -0.43520100 |
| H | -3.90225200 | 2.04952100  | -1.19863800 |
| C | 1.24577700  | 0.63987000  | 3.61416100  |
| C | 1.65310600  | 1.81083300  | 2.73869800  |
| O | 1.92231000  | 1.33669500  | 1.41716700  |
| C | 2.64871600  | 2.28851800  | 0.64332500  |
| C | 1.05104000  | 0.92588600  | -3.61688700 |
| C | 2.28739400  | 0.87924200  | -2.73778000 |
| O | 1.94180700  | 1.30898100  | -1.41881500 |
| C | 3.09151000  | 1.64214100  | -0.64502100 |
| H | 1.18245400  | 0.98780200  | 4.66463000  |
| H | 2.05426700  | -0.09931800 | 3.57468900  |
| H | 0.87771000  | 2.59393100  | 2.70196100  |
| H | 2.56511400  | 2.26450600  | 3.16071600  |
| H | 2.02144900  | 3.17176900  | 0.43391500  |
| H | 3.54231100  | 2.62227300  | 1.19725500  |
| H | 1.35506700  | 0.73858100  | -4.66623200 |
| H | 0.65760500  | 1.94839800  | -3.58015800 |
| H | 2.73090800  | -0.12935800 | -2.69540400 |
| H | 3.04523200  | 1.55942900  | -3.16058700 |
| H | 3.68830400  | 0.73806900  | -0.43520100 |
| H | 3.72606400  | 2.35468900  | -1.19863800 |
| C | -0.06874500 | -1.39880900 | 3.61416100  |
| C | 0.74167400  | -2.33704800 | 2.73869800  |
| O | 0.19645600  | -2.33311700 | 1.41716700  |
| C | 0.65755700  | -3.43811500 | 0.64332500  |
| C | 0.27632100  | -1.37317000 | -3.61688700 |
| C | -0.38225100 | -2.42056300 | -2.73778000 |
| O | 0.16270700  | -2.33614400 | -1.41881500 |
| C | -0.12361900 | -3.49839600 | -0.64502100 |
| H | 0.26423400  | -1.51793600 | 4.66463000  |
| H | -1.11314600 | -1.72938900 | 3.57468900  |
| H | 1.80755500  | -2.05708500 | 2.70196100  |

|   |             |             |             |
|---|-------------|-------------|-------------|
| H | 0.67856200  | -3.35370700 | 3.16071600  |
| H | 1.73610800  | -3.33651100 | 0.43391500  |
| H | 0.49979900  | -4.37886800 | 1.19725500  |
| H | -0.03790400 | -1.54281300 | -4.66623200 |
| H | 1.35856000  | -1.54370200 | -3.58015800 |
| H | -1.47748100 | -2.30035600 | -2.69540400 |
| H | -0.17211100 | -3.41696300 | -3.16058700 |
| H | -1.20496600 | -3.56319900 | -0.43520100 |
| H | 0.17618900  | -4.40421000 | -1.19863800 |

Total Energy= -1430.71130260 au

[K<sup>+</sup>⊂2.2.1] C<sub>1</sub> symmetry

|   |             |             |             |
|---|-------------|-------------|-------------|
| K | 0.00004000  | 0.00001200  | -1.07251200 |
| N | 1.91853300  | -1.68182200 | 0.39040200  |
| N | -1.91858100 | 1.68186400  | 0.39033500  |
| C | 2.10619300  | -1.21631400 | 1.77380500  |
| C | 0.84818100  | -0.84421800 | 2.56033900  |
| O | -0.00013800 | -0.00004700 | 1.78134700  |
| C | -2.10624700 | 1.21659200  | 1.77382000  |
| C | -0.84825900 | 0.84433800  | 2.56031900  |
| H | 2.66215800  | -1.96472200 | 2.37533200  |
| H | 2.73085800  | -0.31866300 | 1.73830400  |
| H | 0.28235500  | -1.72843700 | 2.89284900  |
| H | 1.18222100  | -0.31813300 | 3.46950300  |
| H | -2.66199900 | 1.96521300  | 2.37527500  |
| H | -2.73112200 | 0.31908100  | 1.73849800  |
| H | -0.28225300 | 1.72848800  | 2.89271100  |
| H | -1.18233100 | 0.31839300  | 3.46955300  |
| C | 3.17241300  | -1.52982000 | -0.38174500 |
| C | 3.60890900  | -0.09313100 | -0.65415100 |
| O | 2.63880600  | 0.56553800  | -1.47134800 |
| C | 2.85022500  | 1.97184200  | -1.64186400 |
| C | -1.42670000 | 3.06982400  | 0.29739100  |
| C | 0.08011100  | 3.27016600  | 0.44792700  |
| O | 0.77584600  | 2.62230000  | -0.61801800 |
| C | 2.18958100  | 2.80468300  | -0.55275000 |

|   |             |             |             |
|---|-------------|-------------|-------------|
| H | 4.02276400  | -2.04220200 | 0.11240800  |
| H | 3.02677500  | -2.02048300 | -1.35227600 |
| H | 3.77009000  | 0.47139400  | 0.27661500  |
| H | 4.57512200  | -0.12782900 | -1.18506800 |
| H | 3.92687400  | 2.20093300  | -1.67575800 |
| H | 2.41772200  | 2.23044000  | -2.61721100 |
| H | -1.70313600 | 3.45913700  | -0.69038600 |
| H | -1.92242100 | 3.72135600  | 1.04445000  |
| H | 0.27720000  | 4.35574500  | 0.41443200  |
| H | 0.45937400  | 2.89614100  | 1.40980500  |
| H | 2.44564700  | 3.86735500  | -0.70832900 |
| H | 2.55796000  | 2.51324400  | 0.44618200  |
| C | 1.42664800  | -3.06979600 | 0.29768800  |
| C | -0.08018000 | -3.27009000 | 0.44811200  |
| O | -0.77580300 | -2.62235300 | -0.61798300 |
| C | -2.18953900 | -2.80477200 | -0.55284400 |
| C | -3.17246100 | 1.52971100  | -0.38178100 |
| C | -3.60881200 | 0.09296000  | -0.65409300 |
| O | -2.63873500 | -0.56560500 | -1.47139900 |
| C | -2.85010800 | -1.97190600 | -1.64198100 |
| H | 1.70317700  | -3.45930700 | -0.68998500 |
| H | 1.92229300  | -3.72118500 | 1.04492100  |
| H | -0.27728100 | -4.35567100 | 0.41474600  |
| H | -0.45953100 | -2.89592300 | 1.40989900  |
| H | -2.44556700 | -3.86744500 | -0.70847800 |
| H | -2.55800800 | -2.51337700 | 0.44606700  |
| H | -4.02285100 | 2.04203400  | 0.11236100  |
| H | -3.02689800 | 2.02032800  | -1.35234500 |
| H | -3.76979100 | -0.47155600 | 0.27671400  |
| H | -4.57510200 | 0.12751700  | -1.18488000 |
| H | -3.92675100 | -2.20101800 | -1.67597600 |
| H | -2.41751600 | -2.23045500 | -2.61730200 |

Total Energy= -1142.87274783 au

[K<sup>+</sup>∞2.2.2] C<sub>3</sub> symmetry

|   |            |            |            |
|---|------------|------------|------------|
| K | 0.00000000 | 0.00000000 | 0.00040000 |
|---|------------|------------|------------|

|   |             |             |             |
|---|-------------|-------------|-------------|
| N | 0.00000000  | 0.00000000  | 3.09142000  |
| N | 0.00000000  | 0.00000000  | -3.09199400 |
| C | -1.07341500 | 0.89867900  | 3.55008700  |
| C | -2.37490400 | 0.78651800  | 2.76973200  |
| O | -2.17268400 | 1.23121600  | 1.42830500  |
| C | -3.38956300 | 1.30143300  | 0.68735300  |
| C | -1.36839200 | 0.29537300  | -3.55094000 |
| C | -2.07969100 | 1.38964400  | -2.76867300 |
| O | -2.30930700 | 0.95306100  | -1.42902100 |
| C | -3.11401800 | 1.86784700  | -0.68727800 |
| H | -1.30118800 | 0.73468800  | 4.62265500  |
| H | -0.72505800 | 1.93369200  | 3.45779400  |
| H | -2.76939900 | -0.24359900 | 2.76357300  |
| H | -3.12863000 | 1.42430400  | 3.26236700  |
| H | -3.84174200 | 0.29836700  | 0.60212000  |
| H | -4.10850100 | 1.96087000  | 1.20328000  |
| H | -1.37825600 | 0.57786400  | -4.62295100 |
| H | -1.97103400 | -0.61561000 | -3.46092100 |
| H | -1.50763200 | 2.33274200  | -2.75819600 |
| H | -3.04478700 | 1.59545300  | -3.26241700 |
| H | -2.60252300 | 2.84197600  | -0.60174800 |
| H | -4.07662000 | 2.02806200  | -1.20270600 |
| C | 1.31498600  | 0.48026500  | 3.55008700  |
| C | 1.86859600  | 1.66346800  | 2.76973200  |
| O | 2.15260600  | 1.26599200  | 1.42830500  |
| C | 2.82185500  | 2.28473100  | 0.68735300  |
| C | 0.93999600  | 1.03737600  | -3.55094000 |
| C | 2.24331200  | 1.10624300  | -2.76867300 |
| O | 1.98002900  | 1.52338800  | -1.42902100 |
| C | 3.17461200  | 1.76289500  | -0.68727800 |
| H | 1.28685200  | 0.75951800  | 4.62265500  |
| H | 2.03715600  | -0.33892700 | 3.45779400  |
| H | 1.17373700  | 2.52016900  | 2.76357300  |
| H | 2.79779800  | 1.99732100  | 3.26236700  |
| H | 2.17926500  | 3.17786300  | 0.60212000  |
| H | 3.75241400  | 2.57763100  | 1.20328000  |



|   |             |             |             |
|---|-------------|-------------|-------------|
| H | 1.18957300  | 0.90467300  | -4.62295100 |
| H | 0.45238300  | 2.01477100  | -3.46092100 |
| H | 2.77403000  | 0.13927700  | -2.75819600 |
| H | 2.90409600  | 1.83913600  | -3.26241700 |
| H | 3.76248500  | 0.83286300  | -0.60174800 |
| H | 3.79466300  | 2.51642500  | -1.20270600 |
| C | -0.24157200 | -1.37894400 | 3.55008700  |
| C | 0.50630800  | -2.44998600 | 2.76973200  |
| O | 0.02007800  | -2.49720700 | 1.42830500  |
| C | 0.56770800  | -3.58616400 | 0.68735300  |
| C | 0.42839600  | -1.33274800 | -3.55094000 |
| C | -0.16362100 | -2.49588700 | -2.76867300 |
| O | 0.32927800  | -2.47644900 | -1.42902100 |
| C | -0.06059400 | -3.63074300 | -0.68727800 |
| H | 0.01433600  | -1.49420600 | 4.62265500  |
| H | -1.31209800 | -1.59476500 | 3.45779400  |
| H | 1.59566200  | -2.27657000 | 2.76357300  |
| H | 0.33083200  | -3.42162500 | 3.26236700  |
| H | 1.66247800  | -3.47623000 | 0.60212000  |
| H | 0.35608700  | -4.53850100 | 1.20328000  |
| H | 0.18868300  | -1.48253700 | -4.62295100 |
| H | 1.51865100  | -1.39916000 | -3.46092100 |
| H | -1.26639800 | -2.47201900 | -2.75819600 |
| H | 0.14069100  | -3.43458900 | -3.26241700 |
| H | -1.15996200 | -3.67483900 | -0.60174800 |
| H | 0.28195700  | -4.54448700 | -1.20270600 |

Total Energy= -1296.75300922 au

[K<sup>+</sup>∩3.2.2] C<sub>2</sub> symmetry

|   |             |             |             |
|---|-------------|-------------|-------------|
| K | 0.00000000  | 0.00000000  | 0.13231700  |
| N | -2.23978800 | 2.59363100  | -0.66571800 |
| N | 2.23978800  | -2.59363100 | -0.66571800 |
| O | 0.00000000  | 0.00000000  | 3.25947200  |
| C | -1.07353800 | 0.48043700  | 4.06402100  |
| H | -0.76821600 | 1.41269600  | 4.56869100  |
| H | -1.33308000 | -0.26328400 | 4.83765300  |

|   |             |             |             |
|---|-------------|-------------|-------------|
| C | 1.07353800  | -0.48043700 | 4.06402100  |
| H | 1.33308000  | 0.26328400  | 4.83765300  |
| H | 0.76821600  | -1.41269600 | 4.56869100  |
| C | -1.44617100 | 3.52372300  | -1.48105400 |
| C | 0.00000000  | 3.66681100  | -1.03165700 |
| O | 0.70230800  | 2.45720300  | -1.33139500 |
| C | 2.11736800  | 2.61284600  | -1.42386800 |
| C | 3.35610000  | -2.03223300 | -1.43894600 |
| C | 2.97259000  | -0.86647200 | -2.33488100 |
| O | 2.55781000  | 0.24911000  | -1.54022800 |
| C | 2.68521000  | 1.47995000  | -2.24796800 |
| H | -1.42836900 | 3.16173300  | -2.51590700 |
| H | -1.90938100 | 4.53072900  | -1.50368600 |
| H | 0.45629700  | 4.50263000  | -1.58693200 |
| H | 0.07913900  | 3.89612300  | 0.04401800  |
| H | 2.36101800  | 3.56187400  | -1.92920400 |
| H | 2.57549300  | 2.63363000  | -0.41979400 |
| H | 4.12129500  | -1.66989900 | -0.74370200 |
| H | 3.84218500  | -2.80661000 | -2.06621400 |
| H | 3.85925200  | -0.58796900 | -2.92847000 |
| H | 2.16909700  | -1.13179700 | -3.04220000 |
| H | 3.75007600  | 1.68395600  | -2.45592400 |
| H | 2.14921300  | 1.42549300  | -3.21062200 |
| C | -2.72510900 | 3.25598200  | 0.55377100  |
| C | -3.14041200 | 2.29368600  | 1.65224500  |
| O | -1.97927200 | 1.66864900  | 2.19167200  |
| C | -2.29357400 | 0.72647500  | 3.20891300  |
| C | 2.72510900  | -3.25598200 | 0.55377100  |
| C | 3.14041200  | -2.29368600 | 1.65224500  |
| O | 1.97927200  | -1.66864900 | 2.19167200  |
| C | 2.29357400  | -0.72647500 | 3.20891300  |
| H | -1.92296900 | 3.88749300  | 0.95445900  |
| H | -3.57921500 | 3.92788800  | 0.33203400  |
| H | -3.65796100 | 2.85938900  | 2.44633900  |
| H | -3.84152200 | 1.52735200  | 1.28158600  |
| H | -3.09434400 | 1.11403600  | 3.86206500  |

|   |             |             |             |
|---|-------------|-------------|-------------|
| H | -2.65277200 | -0.21541300 | 2.75709300  |
| H | 1.92296900  | -3.88749300 | 0.95445900  |
| H | 3.57921500  | -3.92788800 | 0.33203400  |
| H | 3.65796100  | -2.85938900 | 2.44633900  |
| H | 3.84152200  | -1.52735200 | 1.28158600  |
| H | 3.09434400  | -1.11403600 | 3.86206500  |
| H | 2.65277200  | 0.21541300  | 2.75709300  |
| C | -3.35610000 | 2.03223300  | -1.43894600 |
| C | -2.97259000 | 0.86647200  | -2.33488100 |
| O | -2.55781000 | -0.24911000 | -1.54022800 |
| C | -2.68521000 | -1.47995000 | -2.24796800 |
| C | 1.44617100  | -3.52372300 | -1.48105400 |
| C | 0.00000000  | -3.66681100 | -1.03165700 |
| O | -0.70230800 | -2.45720300 | -1.33139500 |
| C | -2.11736800 | -2.61284600 | -1.42386800 |
| H | -4.12129500 | 1.66989900  | -0.74370200 |
| H | -3.84218500 | 2.80661000  | -2.06621400 |
| H | -3.85925200 | 0.58796900  | -2.92847000 |
| H | -2.16909700 | 1.13179700  | -3.04220000 |
| H | -3.75007600 | -1.68395600 | -2.45592400 |
| H | -2.14921300 | -1.42549300 | -3.21062200 |
| H | 1.42836900  | -3.16173300 | -2.51590700 |
| H | 1.90938100  | -4.53072900 | -1.50368600 |
| H | -0.45629700 | -4.50263000 | -1.58693200 |
| H | -0.07913900 | -3.89612300 | 0.04401800  |
| H | -2.36101800 | -3.56187400 | -1.92920400 |
| H | -2.57549300 | -2.63363000 | -0.41979400 |

Total Energy= -1450.59483455 au

[K<sup>+</sup>3.3.2] C<sub>1</sub> symmetry

|   |             |             |             |
|---|-------------|-------------|-------------|
| K | 0.51671700  | 0.10406900  | 0.03521000  |
| N | 3.76159500  | -0.67402500 | -0.52525900 |
| N | -3.87005400 | -0.06187200 | -0.97442300 |
| O | -0.30226700 | -1.19519800 | 2.68799800  |
| O | 0.15960600  | 2.97636200  | 0.32220800  |
| C | 0.61883800  | -0.95095200 | 3.74778100  |

|   |             |             |             |
|---|-------------|-------------|-------------|
| H | 1.01746500  | -1.91151600 | 4.11492200  |
| H | 0.11858500  | -0.44042400 | 4.58979700  |
| C | 1.14747000  | 3.85483400  | -0.21369800 |
| H | 1.84495400  | 4.17067400  | 0.58065700  |
| H | 0.66257500  | 4.75583500  | -0.62584400 |
| C | -1.32861000 | -2.10945900 | 3.08570700  |
| H | -0.87735900 | -2.93570400 | 3.66030600  |
| H | -2.05903800 | -1.59680100 | 3.73311700  |
| C | -0.76958400 | 3.66422800  | 1.16147300  |
| H | -0.26229200 | 4.03342000  | 2.07028600  |
| H | -1.17978700 | 4.53024900  | 0.61690000  |
| C | 3.77184700  | -1.70427500 | -1.57398000 |
| C | 2.53100900  | -2.58471300 | -1.58260600 |
| O | 1.41680200  | -1.79087900 | -1.99510200 |
| C | 0.25490300  | -2.54676700 | -2.31844100 |
| C | -3.54595800 | -0.25901200 | -2.38299100 |
| C | -2.14852300 | 0.25628700  | -2.73136900 |
| O | -1.10590000 | -0.56947000 | -2.18440500 |
| C | -0.73408500 | -1.65059100 | -3.03446100 |
| H | 3.82308900  | -1.21038500 | -2.55187500 |
| H | 4.66671900  | -2.35206000 | -1.49765700 |
| H | 2.68277000  | -3.41027400 | -2.29822700 |
| H | 2.33623900  | -3.02868100 | -0.59105700 |
| H | 0.51565800  | -3.38413400 | -2.98780100 |
| H | -0.19579300 | -2.97157900 | -1.40341300 |
| H | -3.59894700 | -1.33075700 | -2.61620200 |
| H | -4.27859500 | 0.23459800  | -3.05193100 |
| H | -2.02621200 | 0.32577400  | -3.82461000 |
| H | -2.00128900 | 1.25470400  | -2.30208000 |
| H | -1.61217000 | -2.25737700 | -3.31220900 |
| H | -0.28185300 | -1.25796400 | -3.96051500 |
| C | 4.27273100  | -1.18346400 | 0.75422400  |
| C | 3.75270200  | -0.41207600 | 1.95821200  |
| O | 2.37252400  | -0.73340000 | 2.13822300  |
| C | 1.76289500  | -0.09092400 | 3.25331600  |
| C | -4.54986700 | -1.18197200 | -0.33149200 |

|   |             |             |             |
|---|-------------|-------------|-------------|
| C | -3.59688700 | -2.25478000 | 0.17499100  |
| O | -2.82324500 | -1.72345300 | 1.24573000  |
| C | -2.02581900 | -2.70336800 | 1.88279700  |
| H | 3.95630600  | -2.22752700 | 0.86997400  |
| H | 5.38048100  | -1.18049800 | 0.78116700  |
| H | 4.31996100  | -0.71125600 | 2.85567900  |
| H | 3.87494800  | 0.67540200  | 1.82537600  |
| H | 2.48343900  | 0.02717400  | 4.07911900  |
| H | 1.41392100  | 0.91823300  | 2.96897300  |
| H | -5.11031600 | -0.80569000 | 0.53332400  |
| H | -5.29038000 | -1.66158800 | -1.00200200 |
| H | -4.18264300 | -3.12138700 | 0.53107300  |
| H | -2.93074100 | -2.60709100 | -0.63261600 |
| H | -2.65544400 | -3.54171600 | 2.23333300  |
| H | -1.27854800 | -3.11811300 | 1.18056400  |
| C | 4.46566000  | 0.54392700  | -0.95307200 |
| C | 3.57579000  | 1.51434700  | -1.71322100 |
| O | 2.61389200  | 2.05419500  | -0.80441400 |
| C | 1.90328100  | 3.16986300  | -1.33005700 |
| C | -4.44434900 | 1.24444200  | -0.65546600 |
| C | -3.89687400 | 1.82307300  | 0.64219400  |
| O | -2.58502300 | 2.32472600  | 0.38831300  |
| C | -1.90137900 | 2.74088200  | 1.55622800  |
| H | 4.84165900  | 1.07035700  | -0.06809000 |
| H | 5.34861700  | 0.30552500  | -1.57607800 |
| H | 4.19702700  | 2.32994100  | -2.12048600 |
| H | 3.06465600  | 1.02125800  | -2.55765300 |
| H | 2.60683800  | 3.89798900  | -1.76890400 |
| H | 1.20749900  | 2.84616000  | -2.12424000 |
| H | -4.20462900 | 1.95141100  | -1.46002400 |
| H | -5.54869800 | 1.20258300  | -0.59160400 |
| H | -4.54310600 | 2.64754500  | 0.99248500  |
| H | -3.86329600 | 1.04915300  | 1.42617700  |
| H | -2.57390500 | 3.30394600  | 2.22762000  |
| H | -1.52904300 | 1.86432300  | 2.11822200  |

Total Energy= -1604.44465819 au

[Rb<sup>+</sup>c2.2.2] *D*<sub>3</sub> symmetry

|    |             |             |             |
|----|-------------|-------------|-------------|
| Rb | 0.00000000  | 0.00000000  | 0.00000000  |
| N  | 0.00000000  | 0.00000000  | 3.09508200  |
| N  | 0.00000000  | 0.00000000  | -3.09508200 |
| C  | 0.32169000  | 1.36551800  | 3.55113200  |
| C  | -0.34832100 | 2.48887200  | 2.76726400  |
| O  | 0.18875400  | 2.55043800  | 1.44518000  |
| C  | -0.30924900 | 3.65596800  | 0.69161800  |
| C  | -0.32169000 | 1.36551800  | -3.55113200 |
| C  | 0.34832100  | 2.48887200  | -2.76726400 |
| O  | -0.18875400 | 2.55043800  | -1.44518000 |
| C  | 0.30924900  | 3.65596800  | -0.69161800 |
| H  | 0.06332700  | 1.49756100  | 4.62100700  |
| H  | 1.40488900  | 1.51318100  | 3.47071700  |
| H  | -1.44312800 | 2.36197400  | 2.71674400  |
| H  | -0.15091200 | 3.43920200  | 3.29232800  |
| H  | -1.40865600 | 3.59969700  | 0.61364700  |
| H  | -0.04805400 | 4.60277800  | 1.19492900  |
| H  | -0.06332700 | 1.49756100  | -4.62100700 |
| H  | -1.40488900 | 1.51318100  | -3.47071700 |
| H  | 1.44312800  | 2.36197400  | -2.71674400 |
| H  | 0.15091200  | 3.43920200  | -3.29232800 |
| H  | 1.40865600  | 3.59969700  | -0.61364700 |
| H  | 0.04805400  | 4.60277800  | -1.19492900 |
| C  | 1.02172800  | -0.96135000 | 3.55113200  |
| C  | 2.32958700  | -0.94278200 | 2.76726400  |
| O  | 2.11436700  | -1.43868500 | 1.44518000  |
| C  | 3.32078500  | -1.56016600 | 0.69161800  |
| C  | 1.34341800  | -0.40416700 | -3.55113200 |
| C  | 1.98126600  | -1.54609000 | -2.76726400 |
| O  | 2.30312100  | -1.11175300 | -1.44518000 |
| C  | 3.01153600  | -2.09580200 | -0.69161800 |
| H  | 1.26526300  | -0.80362300 | 4.62100700  |
| H  | 0.60800900  | -1.97326000 | 3.47071700  |
| H  | 2.76709300  | 0.06879800  | 2.71674400  |

|   |             |             |             |
|---|-------------|-------------|-------------|
| H | 3.05389200  | -1.58890800 | 3.29232800  |
| H | 3.82175700  | -0.57991600 | 0.61364700  |
| H | 4.01015000  | -2.25977200 | 1.19492900  |
| H | 1.32859000  | -0.69393800 | -4.62100700 |
| H | 2.01289700  | 0.46007900  | -3.47071700 |
| H | 1.32396500  | -2.43077200 | -2.71674400 |
| H | 2.90298000  | -1.85029400 | -3.29232800 |
| H | 2.41310100  | -3.01978100 | -0.61364700 |
| H | 3.96209500  | -2.34300500 | -1.19492900 |
| C | -1.34341800 | -0.40416700 | 3.55113200  |
| C | -1.98126600 | -1.54609000 | 2.76726400  |
| O | -2.30312100 | -1.11175300 | 1.44518000  |
| C | -3.01153600 | -2.09580200 | 0.69161800  |
| C | -1.02172800 | -0.96135000 | -3.55113200 |
| C | -2.32958700 | -0.94278200 | -2.76726400 |
| O | -2.11436700 | -1.43868500 | -1.44518000 |
| C | -3.32078500 | -1.56016600 | -0.69161800 |
| H | -1.32859000 | -0.69393800 | 4.62100700  |
| H | -2.01289700 | 0.46007900  | 3.47071700  |
| H | -1.32396500 | -2.43077200 | 2.71674400  |
| H | -2.90298000 | -1.85029400 | 3.29232800  |
| H | -2.41310100 | -3.01978100 | 0.61364700  |
| H | -3.96209500 | -2.34300500 | 1.19492900  |
| H | -1.26526300 | -0.80362300 | -4.62100700 |
| H | -0.60800900 | -1.97326000 | -3.47071700 |
| H | -2.76709300 | 0.06879800  | -2.71674400 |
| H | -3.05389200 | -1.58890800 | -3.29232800 |
| H | -3.82175700 | -0.57991600 | -0.61364700 |
| H | -4.01015000 | -2.25977200 | -1.19492900 |

Total Energy= -1292.52486051 au

[Rb<sup>+</sup>c3.2.2] C<sub>2</sub> symmetry

|    |             |             |             |
|----|-------------|-------------|-------------|
| Rb | 0.00000000  | 0.00000000  | 0.19132300  |
| N  | -2.21230700 | 2.58212400  | -0.67193600 |
| N  | 2.21230700  | -2.58212400 | -0.67193600 |
| O  | 0.00000000  | 0.00000000  | 3.36314400  |

|   |             |             |             |
|---|-------------|-------------|-------------|
| C | -1.01259600 | 0.60551800  | 4.16321900  |
| H | -0.62204600 | 1.53379600  | 4.61333400  |
| H | -1.31291700 | -0.07491300 | 4.97881500  |
| C | 1.01259600  | -0.60551800 | 4.16321900  |
| H | 1.31291700  | 0.07491300  | 4.97881500  |
| H | 0.62204600  | -1.53379600 | 4.61333400  |
| C | -1.46763100 | 3.48360100  | -1.56650700 |
| C | 0.00000000  | 3.66273900  | -1.20711200 |
| O | 0.70818300  | 2.46347400  | -1.52496200 |
| C | 2.12195900  | 2.63270900  | -1.59684800 |
| C | 3.38344300  | -2.01813200 | -1.36161700 |
| C | 3.07786800  | -0.86718200 | -2.30635800 |
| O | 2.62928200  | 0.27473800  | -1.57274000 |
| C | 2.72521300  | 1.46736000  | -2.34819100 |
| H | -1.50133200 | 3.08020200  | -2.58513800 |
| H | -1.94422700 | 4.48377900  | -1.60469000 |
| H | 0.40501300  | 4.49693400  | -1.80422700 |
| H | 0.13909800  | 3.91689700  | -0.14252500 |
| H | 2.36309600  | 3.55854600  | -2.14588400 |
| H | 2.55872700  | 2.71292800  | -0.58584800 |
| H | 4.08836000  | -1.64324000 | -0.61168400 |
| H | 3.92147200  | -2.79917400 | -1.93671000 |
| H | 4.00826000  | -0.61754900 | -2.84431300 |
| H | 2.32171900  | -1.13747400 | -3.06244900 |
| H | 3.78539500  | 1.68873700  | -2.56273300 |
| H | 2.19775700  | 1.34162500  | -3.30897600 |
| C | -2.62553400 | 3.30409700  | 0.54273500  |
| C | -3.04203200 | 2.41241500  | 1.69982800  |
| O | -1.89412700 | 1.77494400  | 2.25554100  |
| C | -2.23489000 | 0.90155900  | 3.32604500  |
| C | 2.62553400  | -3.30409700 | 0.54273500  |
| C | 3.04203200  | -2.41241500 | 1.69982800  |
| O | 1.89412700  | -1.77494400 | 2.25554100  |
| C | 2.23489000  | -0.90155900 | 3.32604500  |
| H | -1.78622000 | 3.92016400  | 0.88743100  |
| H | -3.46143100 | 3.99986000  | 0.32361500  |



|   |             |             |             |
|---|-------------|-------------|-------------|
| H | -3.52342200 | 3.03843700  | 2.47104700  |
| H | -3.77751600 | 1.65197900  | 1.38865300  |
| H | -2.98808000 | 1.37252900  | 3.98126500  |
| H | -2.67001200 | -0.03276700 | 2.92865600  |
| H | 1.78622000  | -3.92016400 | 0.88743100  |
| H | 3.46143100  | -3.99986000 | 0.32361500  |
| H | 3.52342200  | -3.03843700 | 2.47104700  |
| H | 3.77751600  | -1.65197900 | 1.38865300  |
| H | 2.98808000  | -1.37252900 | 3.98126500  |
| H | 2.67001200  | 0.03276700  | 2.92865600  |
| C | -3.38344300 | 2.01813200  | -1.36161700 |
| C | -3.07786800 | 0.86718200  | -2.30635800 |
| O | -2.62928200 | -0.27473800 | -1.57274000 |
| C | -2.72521300 | -1.46736000 | -2.34819100 |
| C | 1.46763100  | -3.48360100 | -1.56650700 |
| C | 0.00000000  | -3.66273900 | -1.20711200 |
| O | -0.70818300 | -2.46347400 | -1.52496200 |
| C | -2.12195900 | -2.63270900 | -1.59684800 |
| H | -4.08836000 | 1.64324000  | -0.61168400 |
| H | -3.92147200 | 2.79917400  | -1.93671000 |
| H | -4.00826000 | 0.61754900  | -2.84431300 |
| H | -2.32171900 | 1.13747400  | -3.06244900 |
| H | -3.78539500 | -1.68873700 | -2.56273300 |
| H | -2.19775700 | -1.34162500 | -3.30897600 |
| H | 1.50133200  | -3.08020200 | -2.58513800 |
| H | 1.94422700  | -4.48377900 | -1.60469000 |
| H | -0.40501300 | -4.49693400 | -1.80422700 |
| H | -0.13909800 | -3.91689700 | -0.14252500 |
| H | -2.36309600 | -3.55854600 | -2.14588400 |
| H | -2.55872700 | -2.71292800 | -0.58584800 |

Total Energy= -1446.37603557 au

[Rb<sup>+</sup>⊂3.3.2] C<sub>1</sub> symmetry

|    |             |             |             |
|----|-------------|-------------|-------------|
| Rb | 0.21345000  | 0.11828900  | 0.08605700  |
| N  | -3.77128500 | 0.04281800  | -0.92592700 |
| N  | 3.68872000  | -0.66339500 | -0.64461900 |

|   |             |             |             |
|---|-------------|-------------|-------------|
| O | 0.24816600  | 3.12140400  | 0.64283100  |
| O | -0.28779700 | -1.59075100 | 2.68699700  |
| C | -0.73178000 | 3.79606900  | 1.42772000  |
| H | -1.13657800 | 4.64747500  | 0.85567600  |
| H | -0.28224100 | 4.18517300  | 2.35860400  |
| C | -1.35765700 | -2.47517900 | 3.02235600  |
| H | -2.05295900 | -1.97852500 | 3.71942600  |
| H | -0.95408700 | -3.37376400 | 3.51875200  |
| C | 1.29753800  | 3.98825700  | 0.21643400  |
| H | 0.87675600  | 4.95450600  | -0.10939300 |
| H | 1.99333800  | 4.17812700  | 1.05097000  |
| C | 0.69229000  | -1.52130200 | 3.71846600  |
| H | 0.25383000  | -1.11376300 | 4.64679400  |
| H | 1.07277800  | -2.53434300 | 3.93174800  |
| C | -3.63628800 | -0.16897200 | -2.36915200 |
| C | -2.31364300 | 0.36847300  | -2.91117800 |
| O | -1.19900900 | -0.41570300 | -2.46269100 |
| C | -0.80621000 | -1.43707200 | -3.37453600 |
| C | 3.68626500  | -1.52319700 | -1.83777600 |
| C | 2.46067000  | -2.41610800 | -1.96250400 |
| O | 1.33871900  | -1.60754700 | -2.32004300 |
| C | 0.19466400  | -2.35765700 | -2.70681800 |
| H | -3.68251600 | -1.24626300 | -2.57506600 |
| H | -4.47255400 | 0.29015700  | -2.93435600 |
| H | -2.33498900 | 0.39557000  | -4.01195600 |
| H | -2.13871200 | 1.39098000  | -2.55290200 |
| H | -1.67430300 | -2.04123200 | -3.68873800 |
| H | -0.35839700 | -0.98266100 | -4.27395300 |
| H | 3.71116300  | -0.88722100 | -2.73085900 |
| H | 4.59308200  | -2.15876500 | -1.87550100 |
| H | 2.64266600  | -3.16304000 | -2.75395800 |
| H | 2.25441100  | -2.96178700 | -1.02543500 |
| H | 0.47630900  | -3.14528400 | -3.42695000 |
| H | -0.25920500 | -2.85068900 | -1.82766100 |
| C | -4.28584300 | 1.37392000  | -0.59103100 |
| C | -3.77865900 | 1.89127100  | 0.74772500  |

|   |             |             |             |
|---|-------------|-------------|-------------|
| O | -2.43304600 | 2.34080600  | 0.58419500  |
| C | -1.85477400 | 2.84340500  | 1.77941800  |
| C | 4.43390400  | 0.58100600  | -0.88979100 |
| C | 3.59463900  | 1.67894000  | -1.52278800 |
| O | 2.67509300  | 2.17599100  | -0.54898500 |
| C | 2.03423800  | 3.37845200  | -0.95546600 |
| H | -3.96561300 | 2.08715500  | -1.36061500 |
| H | -5.39379500 | 1.39245900  | -0.58511100 |
| H | -4.40717900 | 2.73638600  | 1.07849500  |
| H | -3.82556900 | 1.10563700  | 1.51974000  |
| H | -2.59984200 | 3.40411600  | 2.36968200  |
| H | -1.49029500 | 2.01170900  | 2.40989300  |
| H | 4.80921600  | 0.96915900  | 0.06410000  |
| H | 5.32181800  | 0.39927100  | -1.52578800 |
| H | 4.26120500  | 2.49572800  | -1.84896200 |
| H | 3.04778800  | 1.31323600  | -2.40885400 |
| H | 2.78338400  | 4.10867800  | -1.30854900 |
| H | 1.33332900  | 3.18187600  | -1.78629400 |
| C | -4.51265700 | -1.02812000 | -0.25511300 |
| C | -3.64374100 | -2.21340200 | 0.13546200  |
| O | -2.76954900 | -1.82231600 | 1.19121100  |
| C | -2.09228400 | -2.92121700 | 1.77816300  |
| C | 4.20614700  | -1.37580700 | 0.53212100  |
| C | 3.74594500  | -0.78071400 | 1.85456100  |
| O | 2.37918000  | -1.13577400 | 2.06608600  |
| C | 1.83844900  | -0.63353800 | 3.28189600  |
| H | -4.95535300 | -0.63208800 | 0.66666200  |
| H | -5.35430400 | -1.39505500 | -0.87505700 |
| H | -4.29362800 | -3.03772600 | 0.47854100  |
| H | -3.05753800 | -2.58317100 | -0.72455500 |
| H | -2.81538200 | -3.70377300 | 2.07094400  |
| H | -1.38195500 | -3.37078500 | 1.06008500  |
| H | 3.85575400  | -2.41485400 | 0.50016300  |
| H | 5.31400900  | -1.41329800 | 0.52541800  |
| H | 4.36172600  | -1.19230000 | 2.67247600  |
| H | 3.85828900  | 0.31598000  | 1.86461500  |

|   |            |             |            |
|---|------------|-------------|------------|
| H | 2.59845500 | -0.64215100 | 4.08109500 |
| H | 1.50667000 | 0.41256200  | 3.15054500 |

Total Energy= -1600.22462155 au

[Rb<sup>+</sup>c3.3.3] C<sub>1</sub> symmetry

|    |             |             |             |
|----|-------------|-------------|-------------|
| Rb | 0.56265000  | -0.00059300 | 0.00101100  |
| N  | 4.22742200  | -0.00176800 | 0.00017600  |
| N  | -4.47485600 | -0.00134000 | -0.00212200 |
| O  | -0.06234000 | 2.01415400  | 2.30090100  |
| O  | -0.05918100 | 0.99008200  | -2.89188500 |
| O  | -0.06205200 | -3.00040500 | 0.59225300  |
| C  | 0.74584500  | 3.18326400  | 2.39990700  |
| H  | 1.37575600  | 3.12679100  | 3.30410900  |
| H  | 0.10672900  | 4.08007500  | 2.47960700  |
| C  | 0.74761500  | 0.49183800  | -3.95514300 |
| H  | 1.37908700  | 1.30265100  | -4.35688500 |
| H  | 0.10747100  | 0.11539100  | -4.77220200 |
| C  | 0.74463800  | -3.67054500 | 1.55657100  |
| H  | 1.37532900  | -4.42546600 | 1.05669800  |
| H  | 0.10438700  | -4.18773400 | 2.29255900  |
| C  | -0.85970500 | 1.83535400  | 3.47273200  |
| H  | -0.20233400 | 1.70964200  | 4.35096800  |
| H  | -1.48756200 | 2.72725600  | 3.63462200  |
| C  | -0.85383200 | 2.09739400  | -3.32000100 |
| H  | -0.19449000 | 2.92105900  | -3.64571600 |
| H  | -1.48067200 | 1.79613700  | -4.17568600 |
| C  | -0.85635800 | -3.92608800 | -0.15147300 |
| H  | -0.19669900 | -4.62102100 | -0.70024200 |
| H  | -1.48364900 | -4.51525300 | 0.53793100  |
| C  | 4.65037300  | 1.26344800  | 0.61446600  |
| C  | 3.69158200  | 2.41524800  | 0.35159300  |
| O  | 2.50623300  | 2.19600000  | 1.11897100  |
| C  | 1.63035800  | 3.31504500  | 1.17922400  |
| C  | -4.85193000 | 0.33467400  | 1.37048400  |
| C  | -3.80982700 | -0.08148500 | 2.39915500  |
| O  | -2.72744900 | 0.84896000  | 2.35113800  |

|   |             |             |             |
|---|-------------|-------------|-------------|
| C | -1.74586700 | 0.61689900  | 3.34102000  |
| H | 4.70514800  | 1.12976400  | 1.70169100  |
| H | 5.66387900  | 1.55880400  | 0.27977500  |
| H | 4.16549700  | 3.35937500  | 0.66931700  |
| H | 3.44451400  | 2.50046900  | -0.72025600 |
| H | 2.20534400  | 4.25164900  | 1.27220800  |
| H | 1.02296400  | 3.38563200  | 0.25822100  |
| H | -4.97551400 | 1.42178500  | 1.45387600  |
| H | -5.82491700 | -0.11503100 | 1.64941800  |
| H | -4.25911500 | -0.06425500 | 3.40836700  |
| H | -3.44417200 | -1.10239800 | 2.19830100  |
| H | -2.21961300 | 0.43919100  | 4.32362500  |
| H | -1.14535500 | -0.28100000 | 3.09870000  |
| C | 4.65092600  | -0.10267100 | -1.40244600 |
| C | 3.69136100  | -0.90481800 | -2.26892000 |
| O | 2.50604300  | -0.13006100 | -2.46033500 |
| C | 1.62999700  | -0.63387200 | -3.46119600 |
| C | -4.84979800 | 1.01982700  | -0.97973500 |
| C | -3.80826600 | 2.11992900  | -1.12938400 |
| O | -2.72404800 | 1.61543200  | -1.91005200 |
| C | -1.74128000 | 2.58914600  | -2.19845900 |
| H | 4.70713100  | 0.90575700  | -1.83004000 |
| H | 5.66390100  | -0.54148100 | -1.49049000 |
| H | 4.16445000  | -1.10019100 | -3.24612200 |
| H | 3.44457500  | -1.87641700 | -1.80819000 |
| H | 2.20477400  | -1.02063300 | -4.31939600 |
| H | 1.02108500  | -1.46670700 | -3.06399200 |
| H | -4.96949600 | 0.54913500  | -1.96368400 |
| H | -5.82414300 | 1.48501800  | -0.73259600 |
| H | -4.25716600 | 2.98601300  | -1.64808000 |
| H | -3.44467500 | 2.45476900  | -0.14350300 |
| H | -2.21364300 | 3.53070300  | -2.53291500 |
| H | -1.14200800 | 2.82404900  | -1.29776000 |
| C | 4.64994000  | -1.16624800 | 0.78914400  |
| C | 3.69055000  | -1.51378200 | 1.91773100  |
| O | 2.50508300  | -2.06773100 | 1.34355100  |

|   |             |             |             |
|---|-------------|-------------|-------------|
| C | 1.62816900  | -2.67902100 | 2.28185100  |
| C | -4.85096600 | -1.35812900 | -0.39812600 |
| C | -3.80827700 | -2.03958700 | -1.27324800 |
| O | -2.72712600 | -2.46552700 | -0.44313800 |
| C | -1.74316000 | -3.20250600 | -1.14005300 |
| H | 4.70466600  | -2.04113000 | 0.12996500  |
| H | 5.66334700  | -1.02417200 | 1.21255400  |
| H | 4.16358200  | -2.26135900 | 2.57673500  |
| H | 3.44392200  | -0.62793400 | 2.52733400  |
| H | 2.20222700  | -3.22743800 | 3.04745800  |
| H | 1.02009800  | -1.91644300 | 2.80234800  |
| H | -4.97393500 | -1.97443900 | 0.50135700  |
| H | -5.82400800 | -1.37527600 | -0.92697600 |
| H | -4.25732100 | -2.92088000 | -1.76553900 |
| H | -3.44123200 | -1.35349900 | -2.05483600 |
| H | -2.21436900 | -3.96404600 | -1.78780100 |
| H | -1.14362800 | -2.54036400 | -1.79403000 |

Total Energy= -1754.07477338 au

[Rb<sup>+</sup>c3.3.3]  $D_3$  symmetry

|    |             |             |             |
|----|-------------|-------------|-------------|
| Rb | 0.00000000  | -0.00000000 | 0.00004414  |
| N  | 0.00000000  | 4.29228011  | -0.00229595 |
| N  | -0.00000000 | -4.29228011 | -0.00229595 |
| O  | 0.00000000  | -0.00000000 | 3.09293005  |
| O  | -2.67854475 | 0.00245334  | -1.54428251 |
| O  | 2.67854475  | -0.00245334 | -1.54428251 |
| C  | -0.86742613 | 0.79874129  | 3.89381146  |
| H  | -0.27048241 | 1.45427111  | 4.55011740  |
| H  | -1.49654833 | 0.15108999  | 4.52943029  |
| C  | -2.93829505 | 0.79736872  | -2.69865478 |
| H  | -3.80657199 | 1.45188034  | -2.51295871 |
| H  | -3.17176433 | 0.14670612  | -3.55967604 |
| C  | 3.80675603  | 0.79315667  | -1.18943497 |
| H  | 4.08110878  | 1.44846868  | -2.03328159 |
| H  | 4.66930549  | 0.14311633  | -0.95986377 |
| C  | 0.86742613  | -0.79874129 | 3.89381146  |

|   |             |             |             |
|---|-------------|-------------|-------------|
| H | 1.49654833  | -0.15108999 | 4.52943029  |
| H | 0.27048241  | -1.45427111 | 4.55011740  |
| C | -3.80675603 | -0.79315667 | -1.18943497 |
| H | -4.66930549 | -0.14311633 | -0.95986377 |
| H | -4.08110878 | -1.44846868 | -2.03328159 |
| C | 2.93829505  | -0.79736872 | -2.69865478 |
| H | 3.17176433  | -0.14670612 | -3.55967604 |
| H | 3.80657199  | -1.45188034 | -2.51295871 |
| C | -0.64154995 | 4.68623307  | 1.25362603  |
| C | -1.66041100 | 3.67289693  | 1.75466992  |
| O | -0.95531166 | 2.53830165  | 2.26164457  |
| C | -1.75960429 | 1.64473373  | 3.01227808  |
| C | 0.64154995  | -4.68623307 | 1.25362603  |
| C | 1.66041100  | -3.67289693 | 1.75466992  |
| O | 0.95531166  | -2.53830165 | 2.26164457  |
| C | 1.75960429  | -1.64473373 | 3.01227808  |
| H | 0.12578176  | 4.78552250  | 2.03133454  |
| H | -1.13525416 | 5.67412851  | 1.16878161  |
| H | -2.25430777 | 4.12707222  | 2.56674371  |
| H | -2.35068187 | 3.36747948  | 0.95042779  |
| H | -2.45507612 | 2.20039632  | 3.66502660  |
| H | -2.36999997 | 1.00731740  | 2.34499499  |
| H | -0.12578176 | -4.78552250 | 2.03133454  |
| H | 1.13525416  | -5.67412851 | 1.16878161  |
| H | 2.25430777  | -4.12707222 | 2.56674371  |
| H | 2.35068187  | -3.36747948 | 0.95042779  |
| H | 2.45507612  | -2.20039632 | 3.66502660  |
| H | 2.36999997  | -1.00731740 | 2.34499499  |
| C | -0.76574666 | 4.68855921  | -1.18590630 |
| C | -0.69326927 | 3.67534017  | -2.31907722 |
| O | -1.48723176 | 2.54272143  | -1.96154424 |
| C | -1.73005642 | 1.64504596  | -3.03092359 |
| C | -1.40910948 | -4.68394908 | -0.07360654 |
| C | -2.35040868 | -3.67034129 | 0.56093619  |
| O | -2.43774667 | -2.53494433 | -0.30196668 |
| C | -3.48716962 | -1.63959474 | 0.02308910  |

|   |             |             |             |
|---|-------------|-------------|-------------|
| H | -1.82262679 | 4.79054059  | -0.91003353 |
| H | -0.44272899 | 5.67569048  | -1.57077983 |
| H | -1.09902948 | 4.13058241  | -3.23921569 |
| H | 0.34754947  | 3.36760804  | -2.51559313 |
| H | -1.94666412 | 2.19691971  | -3.96211354 |
| H | -0.84470132 | 1.00933783  | -3.22131470 |
| H | -1.70013882 | -4.78084087 | -1.12689450 |
| H | -1.58352091 | -5.67243593 | 0.39489264  |
| H | -3.35077833 | -4.12383006 | 0.67080231  |
| H | -1.99699396 | -3.36595148 | 1.56043097  |
| H | -4.40028702 | -2.19351954 | 0.30218240  |
| H | -3.21015571 | -1.00281064 | 0.88444143  |
| C | 1.40910948  | 4.68394908  | -0.07360654 |
| C | 2.35040868  | 3.67034129  | 0.56093619  |
| O | 2.43774667  | 2.53494433  | -0.30196668 |
| C | 3.48716962  | 1.63959474  | 0.02308910  |
| C | 0.76574666  | -4.68855921 | -1.18590630 |
| C | 0.69326927  | -3.67534017 | -2.31907722 |
| O | 1.48723176  | -2.54272143 | -1.96154424 |
| C | 1.73005642  | -1.64504596 | -3.03092359 |
| H | 1.70013882  | 4.78084087  | -1.12689450 |
| H | 1.58352091  | 5.67243593  | 0.39489264  |
| H | 3.35077833  | 4.12383006  | 0.67080231  |
| H | 1.99699396  | 3.36595148  | 1.56043097  |
| H | 4.40028702  | 2.19351954  | 0.30218240  |
| H | 3.21015571  | 1.00281064  | 0.88444143  |
| H | 1.82262679  | -4.79054059 | -0.91003353 |
| H | 0.44272899  | -5.67569048 | -1.57077983 |
| H | 1.09902948  | -4.13058241 | -3.23921569 |
| H | -0.34754947 | -3.36760804 | -2.51559313 |
| H | 1.94666412  | -2.19691971 | -3.96211354 |
| H | 0.84470132  | -1.00933783 | -3.22131470 |

Total Energy= -1754.07409302 au

[Cs<sup>+</sup>c2.2.2] C<sub>3</sub> symmetry

|    |            |            |             |
|----|------------|------------|-------------|
| Cs | 0.00000000 | 0.00000000 | -0.00093500 |
|----|------------|------------|-------------|



|   |             |             |             |
|---|-------------|-------------|-------------|
| N | 0.00000000  | 0.00000000  | -3.12189100 |
| N | 0.00000000  | 0.00000000  | 3.12213400  |
| C | 1.12194500  | 0.85119900  | -3.56635200 |
| C | 2.41680300  | 0.72167000  | -2.76229000 |
| O | 2.26978300  | 1.33230700  | -1.47724000 |
| C | 3.46486800  | 1.30969500  | -0.69248000 |
| C | 1.36759700  | 0.33584900  | 3.56664100  |
| C | 2.08223800  | 1.42444600  | 2.76407000  |
| O | 2.45786400  | 0.92970200  | 1.47563500  |
| C | 3.19546800  | 1.87247200  | 0.69330500  |
| H | 1.36720200  | 0.65562400  | -4.62926200 |
| H | 0.80699300  | 1.89983000  | -3.50820400 |
| H | 2.71712400  | -0.33297100 | -2.63834500 |
| H | 3.22013800  | 1.22964200  | -3.32280100 |
| H | 3.84695300  | 0.27789900  | -0.60812700 |
| H | 4.24176700  | 1.92462800  | -1.17810500 |
| H | 1.37027400  | 0.64849900  | 4.62988700  |
| H | 1.98416500  | -0.56886600 | 3.50742900  |
| H | 1.45490300  | 2.32480000  | 2.64676500  |
| H | 2.98574100  | 1.72329800  | 3.32261700  |
| H | 2.63625900  | 2.82010100  | 0.60933200  |
| H | 4.16186200  | 2.08675500  | 1.18086400  |
| C | -1.29813200 | 0.54603300  | -3.56635200 |
| C | -1.83338600 | 1.73217800  | -2.76229000 |
| O | -2.28870400 | 1.29953600  | -1.47724000 |
| C | -2.86666400 | 2.34581600  | -0.69248000 |
| C | -0.97465200 | 1.01645000  | 3.56664100  |
| C | -2.27472600 | 1.09104800  | 2.76407000  |
| O | -2.03407800 | 1.66372100  | 1.47563500  |
| C | -3.21934200 | 1.83112100  | 0.69330500  |
| H | -1.25138800 | 0.85622000  | -4.62926200 |
| H | -2.04879800 | -0.25103800 | -3.50820400 |
| H | -1.07020000 | 2.51958400  | -2.63834500 |
| H | -2.67497100 | 2.17390100  | -3.32280100 |
| H | -2.16414400 | 3.19260900  | -0.60812700 |
| H | -3.78766000 | 2.71116400  | -1.17810500 |

|   |             |             |             |
|---|-------------|-------------|-------------|
| H | -1.24675400 | 0.86244200  | 4.62988700  |
| H | -0.49943000 | 2.00277100  | 3.50742900  |
| H | -2.74078700 | 0.09758300  | 2.64676500  |
| H | -2.98529000 | 1.72407900  | 3.32261700  |
| H | -3.76040800 | 0.87301700  | 0.60933200  |
| H | -3.88811300 | 2.56090100  | 1.18086400  |
| C | 0.17618700  | -1.39723200 | -3.56635200 |
| C | -0.58341700 | -2.45384800 | -2.76229000 |
| O | 0.01892000  | -2.63184400 | -1.47724000 |
| C | -0.59820500 | -3.65551200 | -0.69248000 |
| C | -0.39294500 | -1.35229800 | 3.56664100  |
| C | 0.19248800  | -2.51549400 | 2.76407000  |
| O | -0.42378600 | -2.59342400 | 1.47563500  |
| C | 0.02387400  | -3.70359200 | 0.69330500  |
| H | -0.11581400 | -1.51184400 | -4.62926200 |
| H | 1.24180400  | -1.64879200 | -3.50820400 |
| H | -1.64692300 | -2.18661300 | -2.63834500 |
| H | -0.54516800 | -3.40354300 | -3.32280100 |
| H | -1.68280900 | -3.47050800 | -0.60812700 |
| H | -0.45410700 | -4.63579200 | -1.17810500 |
| H | -0.12352000 | -1.51094200 | 4.62988700  |
| H | -1.48473500 | -1.43390400 | 3.50742900  |
| H | 1.28588400  | -2.42238300 | 2.64676500  |
| H | -0.00045100 | -3.44737700 | 3.32261700  |
| H | 1.12415000  | -3.69311700 | 0.60933200  |
| H | -0.27374900 | -4.64765500 | 1.18086400  |

Total Energy= -1288.55984055 au

[Cs<sup>+</sup>c3.2.2] C<sub>2</sub> symmetry

|    |             |             |             |
|----|-------------|-------------|-------------|
| Cs | 0.00000000  | 0.00000000  | 0.23790000  |
| N  | -2.19213900 | 2.58204800  | -0.67988700 |
| N  | 2.19213900  | -2.58204800 | -0.67988700 |
| O  | 0.00000000  | 0.00000000  | 3.46186800  |
| C  | -0.93792100 | 0.72661000  | 4.25380200  |
| H  | -0.46197300 | 1.64158900  | 4.64479200  |
| H  | -1.26923200 | 0.11569000  | 5.11080600  |

|   |             |             |             |
|---|-------------|-------------|-------------|
| C | 0.93792100  | -0.72661000 | 4.25380200  |
| H | 1.26923200  | -0.11569000 | 5.11080600  |
| H | 0.46197300  | -1.64158900 | 4.64479200  |
| C | -1.48616400 | 3.46515400  | -1.62644400 |
| C | 0.00000000  | 3.64738100  | -1.34929900 |
| O | 0.69670800  | 2.45758800  | -1.71987900 |
| C | 2.11032500  | 2.62488900  | -1.79088800 |
| C | 3.39878100  | -2.01384400 | -1.30543300 |
| C | 3.15306900  | -0.88885700 | -2.30022200 |
| O | 2.67280500  | 0.27969900  | -1.63391900 |
| C | 2.72773900  | 1.42710700  | -2.47938200 |
| H | -1.57282400 | 3.04739100  | -2.63568300 |
| H | -1.96163700 | 4.46586500  | -1.65617300 |
| H | 0.36677700  | 4.49172500  | -1.95752400 |
| H | 0.19782600  | 3.89065000  | -0.29089700 |
| H | 2.35209000  | 3.52537100  | -2.38125900 |
| H | 2.54007400  | 2.75499300  | -0.78169800 |
| H | 4.04799800  | -1.61434500 | -0.51871000 |
| H | 3.98219900  | -2.80137900 | -1.82541200 |
| H | 4.11487600  | -0.66277700 | -2.79230500 |
| H | 2.44048800  | -1.17923100 | -3.09039000 |
| H | 3.77932600  | 1.65911300  | -2.72318100 |
| H | 2.19058900  | 1.23166200  | -3.42308400 |
| C | -2.54986500 | 3.34080200  | 0.53262400  |
| C | -2.95727400 | 2.50305100  | 1.73506800  |
| O | -1.81159900 | 1.88855200  | 2.32372900  |
| C | -2.16326400 | 1.07501900  | 3.43840700  |
| C | 2.54986500  | -3.34080200 | 0.53262400  |
| C | 2.95727400  | -2.50305100 | 1.73506800  |
| O | 1.81159900  | -1.88855200 | 2.32372900  |
| C | 2.16326400  | -1.07501900 | 3.43840700  |
| H | -1.68629300 | 3.94678300  | 0.83273100  |
| H | -3.37527900 | 4.05057700  | 0.31789400  |
| H | -3.43437100 | 3.16821400  | 2.47553900  |
| H | -3.69701500 | 1.73039500  | 1.46692000  |
| H | -2.86489700 | 1.61555700  | 4.09772800  |

|   |             |             |             |
|---|-------------|-------------|-------------|
| H | -2.66733600 | 0.15558700  | 3.09056200  |
| H | 1.68629300  | -3.94678300 | 0.83273100  |
| H | 3.37527900  | -4.05057700 | 0.31789400  |
| H | 3.43437100  | -3.16821400 | 2.47553900  |
| H | 3.69701500  | -1.73039500 | 1.46692000  |
| H | 2.86489700  | -1.61555700 | 4.09772800  |
| H | 2.66733600  | -0.15558700 | 3.09056200  |
| C | -3.39878100 | 2.01384400  | -1.30543300 |
| C | -3.15306900 | 0.88885700  | -2.30022200 |
| O | -2.67280500 | -0.27969900 | -1.63391900 |
| C | -2.72773900 | -1.42710700 | -2.47938200 |
| C | 1.48616400  | -3.46515400 | -1.62644400 |
| C | 0.00000000  | -3.64738100 | -1.34929900 |
| O | -0.69670800 | -2.45758800 | -1.71987900 |
| C | -2.11032500 | -2.62488900 | -1.79088800 |
| H | -4.04799800 | 1.61434500  | -0.51871000 |
| H | -3.98219900 | 2.80137900  | -1.82541200 |
| H | -4.11487600 | 0.66277700  | -2.79230500 |
| H | -2.44048800 | 1.17923100  | -3.09039000 |
| H | -3.77932600 | -1.65911300 | -2.72318100 |
| H | -2.19058900 | -1.23166200 | -3.42308400 |
| H | 1.57282400  | -3.04739100 | -2.63568300 |
| H | 1.96163700  | -4.46586500 | -1.65617300 |
| H | -0.36677700 | -4.49172500 | -1.95752400 |
| H | -0.19782600 | -3.89065000 | -0.29089700 |
| H | -2.35209000 | -3.52537100 | -2.38125900 |
| H | -2.54007400 | -2.75499300 | -0.78169800 |

Total Energy= -1442.42606925 au

[Cs<sup>+</sup>c3.3.2] C<sub>2</sub> symmetry

|    |             |             |             |
|----|-------------|-------------|-------------|
| Cs | 0.00000000  | 0.00000000  | -0.10921800 |
| N  | 0.98069500  | 3.60861100  | 0.76839200  |
| N  | -0.98069500 | -3.60861100 | 0.76839200  |
| O  | -2.73267200 | 0.71039500  | -1.84896700 |
| O  | 2.73267200  | -0.71039500 | -1.84896700 |
| C  | -2.75540900 | 1.81260100  | -2.74935100 |

|   |             |             |             |
|---|-------------|-------------|-------------|
| H | -3.55693400 | 2.51167600  | -2.45599700 |
| H | -2.95604200 | 1.46884800  | -3.78000000 |
| C | 3.96357400  | 0.00947600  | -1.84702200 |
| H | 4.01868000  | 0.66356000  | -2.73357200 |
| H | 4.81096100  | -0.69621600 | -1.88568600 |
| C | -3.96357400 | -0.00947600 | -1.84702200 |
| H | -4.81096100 | 0.69621600  | -1.88568600 |
| H | -4.01868000 | -0.66356000 | -2.73357200 |
| C | 2.75540900  | -1.81260100 | -2.74935100 |
| H | 2.95604200  | -1.46884800 | -3.78000000 |
| H | 3.55693400  | -2.51167600 | -2.45599700 |
| C | 0.85373300  | 3.72461800  | 2.22945500  |
| C | -0.21039400 | 2.83430200  | 2.85504600  |
| O | 0.22157700  | 1.46950300  | 2.82524900  |
| C | -0.31465000 | 0.68807100  | 3.89049900  |
| C | -0.85373300 | -3.72461800 | 2.22945500  |
| C | 0.21039400  | -2.83430200 | 2.85504600  |
| O | -0.22157700 | -1.46950300 | 2.82524900  |
| C | 0.31465000  | -0.68807100 | 3.89049900  |
| H | 1.80986300  | 3.44967700  | 2.69017100  |
| H | 0.65061100  | 4.77343100  | 2.52633600  |
| H | -0.34927600 | 3.15167400  | 3.90156400  |
| H | -1.18377800 | 2.93149400  | 2.34561700  |
| H | -0.09000000 | 1.17411100  | 4.85540700  |
| H | -1.41102200 | 0.59842900  | 3.79886600  |
| H | -1.80986300 | -3.44967700 | 2.69017100  |
| H | -0.65061100 | -4.77343100 | 2.52633600  |
| H | 0.34927600  | -3.15167400 | 3.90156400  |
| H | 1.18377800  | -2.93149400 | 2.34561700  |
| H | 0.09000000  | -1.17411100 | 4.85540700  |
| H | 1.41102200  | -0.59842900 | 3.79886600  |
| C | 0.00000000  | 4.46989700  | 0.08994700  |
| C | -0.26328200 | 4.09332700  | -1.36062600 |
| O | -1.13756100 | 2.96578700  | -1.40268700 |
| C | -1.42195400 | 2.52798200  | -2.72586600 |
| C | -2.35071300 | -3.94035700 | 0.34528800  |

|   |             |             |             |
|---|-------------|-------------|-------------|
| C | -3.33725900 | -2.79333500 | 0.48900600  |
| O | -3.09535500 | -1.83211700 | -0.53701500 |
| C | -4.09718500 | -0.82578900 | -0.58139200 |
| H | -0.95655700 | 4.40657100  | 0.62337200  |
| H | 0.31492600  | 5.53273400  | 0.12735000  |
| H | -0.74337600 | 4.94499900  | -1.87257800 |
| H | 0.67295200  | 3.86484300  | -1.89591200 |
| H | -1.48866200 | 3.38765900  | -3.41388800 |
| H | -0.61308000 | 1.87044600  | -3.09268700 |
| H | -2.34099100 | -4.22786300 | -0.71201900 |
| H | -2.73861900 | -4.81461500 | 0.90514400  |
| H | -4.36188600 | -3.19092000 | 0.38426200  |
| H | -3.26352700 | -2.31438600 | 1.48071100  |
| H | -5.10047200 | -1.28810400 | -0.57860700 |
| H | -4.02480800 | -0.16921100 | 0.30435300  |
| C | 2.35071300  | 3.94035700  | 0.34528800  |
| C | 3.33725900  | 2.79333500  | 0.48900600  |
| O | 3.09535500  | 1.83211700  | -0.53701500 |
| C | 4.09718500  | 0.82578900  | -0.58139200 |
| C | 0.00000000  | -4.46989700 | 0.08994700  |
| C | 0.26328200  | -4.09332700 | -1.36062600 |
| O | 1.13756100  | -2.96578700 | -1.40268700 |
| C | 1.42195400  | -2.52798200 | -2.72586600 |
| H | 2.34099100  | 4.22786300  | -0.71201900 |
| H | 2.73861900  | 4.81461500  | 0.90514400  |
| H | 4.36188600  | 3.19092000  | 0.38426200  |
| H | 3.26352700  | 2.31438600  | 1.48071100  |
| H | 5.10047200  | 1.28810400  | -0.57860700 |
| H | 4.02480800  | 0.16921100  | 0.30435300  |
| H | 0.95655700  | -4.40657100 | 0.62337200  |
| H | -0.31492600 | -5.53273400 | 0.12735000  |
| H | 0.74337600  | -4.94499900 | -1.87257800 |
| H | -0.67295200 | -3.86484300 | -1.89591200 |
| H | 1.48866200  | -3.38765900 | -3.41388800 |
| H | 0.61308000  | -1.87044600 | -3.09268700 |

Total Energy= -1596.27656106 au

[Cs<sup>+</sup>3.3.3] *D*<sub>3</sub> symmetry

|    |             |             |             |
|----|-------------|-------------|-------------|
| Cs | 0.00000000  | 0.00000000  | 0.00000000  |
| N  | 0.00000000  | 0.00000000  | 4.23497500  |
| N  | 0.00000000  | 0.00000000  | -4.23497500 |
| O  | 0.00000000  | 3.28188000  | 0.00000000  |
| O  | 2.84219200  | -1.64094000 | 0.00000000  |
| O  | -2.84219200 | -1.64094000 | 0.00000000  |
| C  | 0.81673200  | 4.08072600  | 0.85035600  |
| H  | 0.18116200  | 4.71927600  | 1.48734200  |
| H  | 1.46786200  | 4.73502400  | 0.24383700  |
| C  | 3.12564700  | -2.74767400 | 0.85035600  |
| H  | 3.99643200  | -2.51652900 | 1.48734200  |
| H  | 3.36672100  | -3.63871800 | 0.24383700  |
| C  | -3.94237900 | -1.33305200 | 0.85035600  |
| H  | -4.17759400 | -2.20274700 | 1.48734200  |
| H  | -4.83458200 | -1.09630700 | 0.24383700  |
| C  | -0.81673200 | 4.08072600  | -0.85035600 |
| H  | -1.46786200 | 4.73502400  | -0.24383700 |
| H  | -0.18116200 | 4.71927600  | -1.48734200 |
| C  | 3.94237900  | -1.33305200 | -0.85035600 |
| H  | 4.83458200  | -1.09630700 | -0.24383700 |
| H  | 4.17759400  | -2.20274700 | -1.48734200 |
| C  | -3.12564700 | -2.74767400 | -0.85035600 |
| H  | -3.36672100 | -3.63871800 | -0.24383700 |
| H  | -3.99643200 | -2.51652900 | -1.48734200 |
| C  | 0.49422500  | 1.31337100  | 4.66468000  |
| C  | 1.52920100  | 1.91438000  | 3.72519900  |
| O  | 0.85677100  | 2.41809900  | 2.57023100  |
| C  | 1.68361900  | 3.19860000  | 1.72195300  |
| C  | -0.49422500 | 1.31337100  | -4.66468000 |
| C  | -1.52920100 | 1.91438000  | -3.72519900 |
| O  | -0.85677100 | 2.41809900  | -2.57023100 |
| C  | -1.68361900 | 3.19860000  | -1.72195300 |
| H  | -0.34738800 | 2.01529700  | 4.70790400  |
| H  | 0.92129200  | 1.26897100  | 5.68625200  |

|   |             |             |             |
|---|-------------|-------------|-------------|
| H | 2.04460000  | 2.74501600  | 4.23780100  |
| H | 2.28841200  | 1.16927800  | 3.43259400  |
| H | 2.34256000  | 3.85328500  | 2.31841300  |
| H | 2.33158600  | 2.55118800  | 1.10202200  |
| H | 0.34738800  | 2.01529700  | -4.70790400 |
| H | -0.92129200 | 1.26897100  | -5.68625200 |
| H | -2.04460000 | 2.74501600  | -4.23780100 |
| H | -2.28841200 | 1.16927800  | -3.43259400 |
| H | -2.34256000 | 3.85328500  | -2.31841300 |
| H | -2.33158600 | 2.55118800  | -1.10202200 |
| C | 0.89030000  | -1.08469700 | 4.66468000  |
| C | 0.89330100  | -2.28151700 | 3.72519900  |
| O | 1.66575000  | -1.95103500 | 2.57023100  |
| C | 1.92825900  | -3.05735700 | 1.72195300  |
| C | 1.38452500  | -0.22867400 | -4.66468000 |
| C | 2.42250200  | 0.36713700  | -3.72519900 |
| O | 2.52252100  | -0.46706400 | -2.57023100 |
| C | 3.61187800  | -0.14124300 | -1.72195300 |
| H | 1.91899200  | -0.70680100 | 4.70790400  |
| H | 0.63831500  | -1.43234800 | 5.68625200  |
| H | 1.35495300  | -3.14318300 | 4.23780100  |
| H | -0.13158100 | -2.56646200 | 3.43259400  |
| H | 2.16576300  | -3.95535900 | 2.31841300  |
| H | 1.04360100  | -3.29480700 | 1.10202200  |
| H | 1.57160400  | -1.30849500 | -4.70790400 |
| H | 1.55960700  | 0.16337700  | -5.68625200 |
| H | 3.39955300  | 0.39816800  | -4.23780100 |
| H | 2.15683100  | 1.39718300  | -3.43259400 |
| H | 4.50832200  | 0.10207400  | -2.31841300 |
| H | 3.37518700  | 0.74361900  | -1.10202200 |
| C | -1.38452500 | -0.22867400 | 4.66468000  |
| C | -2.42250200 | 0.36713700  | 3.72519900  |
| O | -2.52252100 | -0.46706400 | 2.57023100  |
| C | -3.61187800 | -0.14124300 | 1.72195300  |
| C | -0.89030000 | -1.08469700 | -4.66468000 |
| C | -0.89330100 | -2.28151700 | -3.72519900 |



|   |             |             |             |
|---|-------------|-------------|-------------|
| O | -1.66575000 | -1.95103500 | -2.57023100 |
| C | -1.92825900 | -3.05735700 | -1.72195300 |
| H | -1.57160400 | -1.30849500 | 4.70790400  |
| H | -1.55960700 | 0.16337700  | 5.68625200  |
| H | -3.39955300 | 0.39816800  | 4.23780100  |
| H | -2.15683100 | 1.39718300  | 3.43259400  |
| H | -4.50832200 | 0.10207400  | 2.31841300  |
| H | -3.37518700 | 0.74361900  | 1.10202200  |
| H | -1.91899200 | -0.70680100 | -4.70790400 |
| H | -0.63831500 | -1.43234800 | -5.68625200 |
| H | -1.35495300 | -3.14318300 | -4.23780100 |
| H | 0.13158100  | -2.56646200 | -3.43259400 |
| H | -2.16576300 | -3.95535900 | -2.31841300 |
| H | -1.04360100 | -3.29480700 | -1.10202200 |

Total Energy= -1750.12835280 au
